# Supplementary material for: Reduced IQGAP2 Promotes Bladder Cancer through Regulation of MAPK/ERK Pathway and Cytokines
Source: MDPI journal article supplement (doi:10.3390/ijms232113508), 2022-11-04
Supplement: s1 [file s1]

## **Supplementary Data**

**Table S1**

**Table S2**

**Table S3**

**Figure S1**

**Figure S2**

**Figure S3**

**Table S1. Sequences of primers for Expression analyses of target genes by RT-qPCR**

| Target gene  | Primer  | Sequence (5' – 3')     |
|--------------|---------|------------------------|
| RPS13        | forward | CGAAAGCATCTTGAGAGGAACA |
|              | reverse | TCGAGCCAAACGGTGAATC    |
| RPS23        | forward | TGGAGGTGCTTCTCATGCAA   |
|              | reverse | AATGGCAGAATTTGGCTGTTTG |
| IQGAP2       | forward | TCAAGATTGGACTGC        |
|              | reverse | AGGTTTGGTCTGGAGGAG     |
| CDH1         | forward | CGTAGCAGTGACGAATGTGGT  |
|              | reverse | TGGGGGCTTCATTCACATCC   |
| CDH2         | forward | TGACTATGAAGGCAGTGGCTC  |
|              | reverse | CCTGCTCACCACCACTACTT   |
| MMP9         | forward | GAGACGGGTATCCCTTCGAC   |
|              | reverse | AGTTGGAACCACGACGCC     |
| IQGAP2 TV1   | forward | AGGCGGCAGAACATTGCTTA   |
|              | reverse | CCAATTCAGTGGTTGGTGGC   |
| IQGAP2 TV2   | forward | GTGTAGGAAGGAGTTGTGGCA  |
|              | reverse | TCGCTCTTAACCACTGGACG   |
| IQGAP2 TV3+4 | forward | GAGTTCCTGGGTCACACCTG   |
|              | reverse | TCCTTTCCAAAAAGCCTCGAT  |
| IL6          | forward | TGCGTTGCACTTGTTTACGC   |
|              | reverse | GGAGGCTACCACTTCCACCT   |
| IL8          | forward | ACCGGAAGGAACCATCTCAC   |
|              | reverse | GGCAAACTGCACCTTCACAC   |
| CCL2         | forward | GCTCAGCCAGATGCAATCAAT  |
|              | reverse | CACTTGCTGCTGGTGATTCTT  |
| BCL-2        | forward | CCTTTGTGGAAGTGTACGGC   |
|              | reverse | CCGGCCAACAACATGGAAAG   |
| CASPASE3     | forward | TCTGGTTTTCGGTGGGTGTG   |
|              | reverse | GTCGGCCTCCACTGGTATTT   |

**Table S2. The Significant Changes of IQGAP2 Expression in Transcription Level between bladder cancer and normal tissues (ONCOMINE Database)**

| <b>Types of BC VS. Normal tissues</b>                             | <b>Fold Change</b> | <b>P value</b> | <b>t-test</b> | <b>Reference or Source</b> |
|-------------------------------------------------------------------|--------------------|----------------|---------------|----------------------------|
| Bladder Urothelial Carcinoma                                      | -1.124             | 0.013          | -2.526        | TCGA [42]                  |
| Infiltrating Bladder Urothelial Carcinoma, Micropapillary Variant | -1.135             | 2.51E-5        | -4.586        | TCGA [42]                  |
| Infiltrating Bladder Urothelial Carcinoma                         | -1.121             | 6.98E-9        | -6.190        | TCGA [42]                  |
| Superficial Bladder Cancer                                        | -1.303             | 1.95E-10       | -6.881        | Lee [43]                   |
| Infiltrating Bladder Urothelial Carcinoma                         | -1.169             | 9.82E-4        | -3.162        | Lee [43]                   |
| Superficial Bladder Cancer                                        | -3.363             | 1.91E-9        | -7.671        | Sanchez-Carbayo [44]       |
| Infiltrating Bladder Urothelial Carcinoma                         | -1.504             | 7.91E-6        | -4.496        | Sanchez-Carbayo [44]       |
| Superficial Bladder Cancer                                        | -1.324             | 0.034          | -1.885        | Dyrskjot [45]              |

**Table S3. The correlated frequently altered neighbor genes of IQGAP2 in patients with Bladder Cancer (TCGA Database) (Spearman's Correlation > 0.5)**

| Correlated Gene | Cytoband       | Spearman's Correlation | p-Value  | q-Value  |
|-----------------|----------------|------------------------|----------|----------|
| TNFSF8          | 9q32-q33.1     | 0,808337256            | 1,87E-95 | 3,74E-91 |
| SLCO2B1         | 11q13.4        | 0,801996451            | 6,84E-93 | 6,85E-89 |
| CD84            | 1q23.3         | 0,793993569            | 8,72E-90 | 5,82E-86 |
| EVI2A           | 17q11.2        | 0,784810509            | 2,18E-86 | 1,09E-82 |
| MPEG1           | 11q12.1        | 0,781185079            | 4,30E-85 | 1,72E-81 |
| RCSD1           | 1q24.2         | 0,780779407            | 5,98E-85 | 2,00E-81 |
| DOCK2           | 5q35.1         | 0,77991753             | 1,20E-84 | 3,44E-81 |
| NCKAP1L         | 12q13.13-q13.2 | 0,774234585            | 1,12E-82 | 2,80E-79 |
| IL10RA          | 11q23.3        | 0,770261613            | 2,47E-81 | 5,48E-78 |
| PIK3R5          | 17p13.1        | 0,768106391            | 1,29E-80 | 2,57E-77 |
| ZEB2            | 2q22.3         | 0,766308959            | 5,02E-80 | 8,95E-77 |
| BTK             | Xq22.1         | 0,766221322            | 5,37E-80 | 8,95E-77 |
| C3AR1           | 12p13.31       | 0,764845288            | 1,51E-79 | 2,33E-76 |
| MS4A4A          | 11q12.2        | 0,764159568            | 2,52E-79 | 3,61E-76 |
| WIPF1           | 2q31.1         | 0,763299104            | 4,79E-79 | 6,40E-76 |
| EVI2B           | 17q11.2        | 0,762269376            | 1,03E-78 | 1,29E-75 |
| MS4A6A          | 11q12.2        | 0,761587719            | 1,70E-78 | 2,00E-75 |
| PTPRC           | 1q31.3-q32.1   | 0,761283288            | 2,13E-78 | 2,37E-75 |
| TFEC            | 7q31.2         | 0,761196182            | 2,27E-78 | 2,39E-75 |
| PLEK            | 2p14           | 0,76079475             | 3,05E-78 | 3,05E-75 |
| CYBB            | Xp21.1-p11.4   | 0,760529897            | 3,71E-78 | 3,53E-75 |
| TLR8            | Xp22.2         | 0,760077578            | 5,17E-78 | 4,70E-75 |
| WDFY4           | 10q11.23       | 0,759672614            | 6,95E-78 | 6,04E-75 |
| TASL            | Xp21.2         | 0,758820353            | 1,29E-77 | 1,08E-74 |
| GGTA1           | 9q33.2         | 0,758375857            | 1,79E-77 | 1,43E-74 |
| CD28            | 2q33.2         | 0,75755304             | 3,24E-77 | 2,50E-74 |
| DOCK10          | 2q36.2         | 0,756843013            | 5,41E-77 | 4,01E-74 |
| FGL2            | 7q11.23        | 0,754484038            | 2,93E-76 | 2,10E-73 |
| AOAH            | 7p14.2         | 0,753287342            | 6,87E-76 | 4,74E-73 |
| IRF8            | 16q24.1        | 0,75165034             | 2,18E-75 | 1,45E-72 |
| ITGB2           | 21q22.3        | 0,75107982             | 3,25E-75 | 2,10E-72 |
| NFAM1           | 22q13.2        | 0,749345818            | 1,09E-74 | 6,82E-72 |
| CD163           | 12p13.31       | 0,748374219            | 2,14E-74 | 1,30E-71 |
| CD53            | 1p13.3         | 0,747363396            | 4,30E-74 | 2,53E-71 |
| MSR1            | 8p22           | 0,746235606            | 9,33E-74 | 5,34E-71 |
| ITGA4           | 2q31.3         | 0,745824633            | 1,24E-73 | 6,87E-71 |
| GPR34           | Xp11.4         | 0,742153618            | 1,49E-72 | 8,05E-70 |
| SLA             | 8q24.22        | 0,741768264            | 1,93E-72 | 1,02E-69 |
| KLHL6           | 3q27.1         | 0,741360825            | 2,53E-72 | 1,30E-69 |
| LCP2            | 5q35.1         | 0,740510201            | 4,47E-72 | 2,24E-69 |
| GIMAP4          | 7q36.1         | 0,740091156            | 5,92E-72 | 2,89E-69 |
| CD37            | 19q13.33       | 0,739893091            | 6,75E-72 | 3,22E-69 |
| LAIR1           | 19q13.42       | 0,739192882            | 1,07E-71 | 5,00E-69 |
| BIN2            | 12q13.13       | 0,736639618            | 5,78E-71 | 2,63E-68 |
| SELPLG          | 12q24.11       | 0,734292659            | 2,67E-70 | 1,19E-67 |
| GNG2            | 14q22.1        | 0,73421792             | 2,80E-70 | 1,22E-67 |
| RNASE6          | 14q11.2        | 0,732757727            | 7,20E-70 | 3,06E-67 |
| PIK3AP1         | 10q24.1        | 0,731525395            | 1,59E-69 | 6,62E-67 |
| RASGRP4         | 19q13.2        | 0,73125133             | 1,89E-69 | 7,73E-67 |

|          |                    |             |          |          |
|----------|--------------------|-------------|----------|----------|
| MNDA     | 1q23.1             | 0,730837201 | 2,46E-69 | 9,86E-67 |
| DOCK11   | Xq24               | 0,730365271 | 3,33E-69 | 1,31E-66 |
| SIGLEC7  | 19q13.41           | 0,729332638 | 6,42E-69 | 2,43E-66 |
| CMKLR1   | 12q23.3            | 0,729326001 | 6,44E-69 | 2,43E-66 |
| PIK3R6   | 17p13.1            | 0,728772619 | 9,15E-69 | 3,39E-66 |
| PARVG    | 22q13.31           | 0,728456206 | 1,12E-68 | 4,07E-66 |
| CYTIP    | 2q24.1             | 0,728072057 | 1,42E-68 | 5,09E-66 |
| IKZF1    | 7p12.2             | 0,727392344 | 2,18E-68 | 7,67E-66 |
| PPP1R16B | 20q11.23           | 0,727024659 | 2,75E-68 | 9,49E-66 |
| CR1      | 1q32.2             | 0,72683887  | 3,09E-68 | 1,05E-65 |
| ITM2A    | Xq21.1             | 0,726746378 | 3,28E-68 | 1,09E-65 |
| SLC7A7   | 14q11.2            | 0,725746156 | 6,12E-68 | 2,01E-65 |
| LY86     | 6p25.1             | 0,72520111  | 8,60E-68 | 2,78E-65 |
| CD33     | 19q13.41           | 0,724885636 | 1,05E-67 | 3,32E-65 |
| SCIMP    | 17p13.2            | 0,724665417 | 1,20E-67 | 3,75E-65 |
| SAMSN1   | 21q11.2            | 0,723837588 | 2,00E-67 | 6,17E-65 |
| CSF2RB   | 22q12.3            | 0,723355411 | 2,70E-67 | 8,19E-65 |
| LILRB4   | 19q13.42           | 0,722019958 | 6,14E-67 | 1,83E-64 |
| MRC1     | 10p12.33           | 0,721840678 | 6,86E-67 | 2,02E-64 |
| GPR183   | 13q32.3            | 0,721495432 | 8,47E-67 | 2,46E-64 |
| STARD8   | Xq13.1             | 0,721469813 | 8,61E-67 | 2,46E-64 |
| GAB3     | Xq28               | 0,719773976 | 2,42E-66 | 6,78E-64 |
| PDE4B    | 1p31.3             | 0,719749946 | 2,46E-66 | 6,78E-64 |
| GPR65    | 14q31.3            | 0,719739168 | 2,47E-66 | 6,78E-64 |
| CSF1R    | 5q32               | 0,719021114 | 3,82E-66 | 1,03E-63 |
| VCAM1    | 1p21.2             | 0,718837714 | 4,27E-66 | 1,14E-63 |
| IGSF6    | 16p12.2            | 0,718341401 | 5,77E-66 | 1,52E-63 |
| PILRA    | 7q22.1             | 0,718111532 | 6,63E-66 | 1,72E-63 |
| WAS      | Xp11.23            | 0,718095277 | 6,69E-66 | 1,72E-63 |
| C1QC     | 1p36.12            | 0,717676353 | 8,62E-66 | 2,18E-63 |
| IFFO1    | 12p13.31           | 0,716316076 | 1,95E-65 | 4,88E-63 |
| IL2RA    | 10p15.1            | 0,715751228 | 2,73E-65 | 6,75E-63 |
| TYROBP   | 19q13.12           | 0,715686333 | 2,84E-65 | 6,93E-63 |
| HAVCR2   | 5q33.3             | 0,714355531 | 6,27E-65 | 1,51E-62 |
| CD48     | 1q23.3             | 0,714050393 | 7,52E-65 | 1,79E-62 |
| FPR3     | 19q13.41           | 0,713869643 | 8,37E-65 | 1,97E-62 |
| SPI1     | 11p11.2            | 0,71381063  | 8,67E-65 | 2,02E-62 |
| FCGR3A   | 1q23.3             | 0,713594012 | 9,85E-65 | 2,27E-62 |
| ATP8B4   | 15q21.2            | 0,713072963 | 1,34E-64 | 3,05E-62 |
| SASH3    | Xq26.1             | 0,711798347 | 2,84E-64 | 6,39E-62 |
| LILRB1   | 19q13.42           | 0,710574471 | 5,82E-64 | 1,29E-61 |
| CYTH4    | 22q13.1            | 0,710227957 | 7,12E-64 | 1,57E-61 |
| SLAMF8   | 1q23.2             | 0,709724224 | 9,55E-64 | 2,08E-61 |
| PLXNC1   | 12q22              | 0,709352957 | 1,18E-63 | 2,55E-61 |
| AP1S2    | Xp22.2             | 0,709278974 | 1,24E-63 | 2,63E-61 |
| C5AR1    | 19q13.32           | 0,709131971 | 1,35E-63 | 2,84E-61 |
| LILRB2   | 19q13.4            | 0,70853     | 1,91E-63 | 3,98E-61 |
| FLI1     | 11q24.3            | 0,707558167 | 3,35E-63 | 6,91E-61 |
| RUBCNL   | 13q14.13           | 0,707406607 | 3,65E-63 | 7,46E-61 |
| LRRC25   | 19p13.11           | 0,707319168 | 3,84E-63 | 7,77E-61 |
| VSIG4    | Xq12               | 0,70715856  | 4,22E-63 | 8,44E-61 |
| SYT11    | 1q22               | 0,706461885 | 6,29E-63 | 1,25E-60 |
| P2RY8    | Xp22.33 and Yp11.3 | 0,706380432 | 6,59E-63 | 1,29E-60 |
| ITK      | 5q33.3             | 0,706347901 | 6,72E-63 | 1,30E-60 |
| SIGLEC10 | 19q13.41           | 0,706040134 | 8,01E-63 | 1,54E-60 |

|          |                |             |          |          |
|----------|----------------|-------------|----------|----------|
| HCK      | 20q11.21       | 0,70484432  | 1,59E-62 | 3,02E-60 |
| RGS18    | 1q31.2         | 0,704312533 | 2,15E-62 | 4,06E-60 |
| C1QB     | 1p36.12        | 0,704161956 | 2,34E-62 | 4,38E-60 |
| FCER1G   | 1q23.3         | 0,703435629 | 3,53E-62 | 6,55E-60 |
| PTPN22   | 1p13.2         | 0,703057934 | 4,38E-62 | 8,02E-60 |
| SIGLEC9  | 19q13.3-q13.4  | 0,703045962 | 4,41E-62 | 8,02E-60 |
| GPR141   | 7p14.1         | 0,702806575 | 5,05E-62 | 9,10E-60 |
| AIF1     | 6p21.33        | 0,702420534 | 6,28E-62 | 1,12E-59 |
| SLAMF6   | 1q23.2-q23.3   | 0,702365912 | 6,47E-62 | 1,15E-59 |
| KCNA3    | 1p13.3         | 0,702186248 | 7,16E-62 | 1,26E-59 |
| TMEM176B | 7q36.1         | 0,701249986 | 1,21E-61 | 2,11E-59 |
| LILRB5   | 19q13.4        | 0,701235882 | 1,22E-61 | 2,11E-59 |
| GYPC     | 2q14.3         | 0,701094003 | 1,32E-61 | 2,26E-59 |
| SPN      | 16p11.2        | 0,700624693 | 1,72E-61 | 2,92E-59 |
| CD180    | 5q12.3         | 0,700529635 | 1,82E-61 | 3,06E-59 |
| CPVL     | 7p14.3         | 0,699913883 | 2,56E-61 | 4,27E-59 |
| ABCD2    | 12q12          | 0,699729711 | 2,84E-61 | 4,70E-59 |
| CCR2     | 3p21.31        | 0,699493214 | 3,24E-61 | 5,32E-59 |
| LYZ      | 12q15          | 0,698814363 | 4,73E-61 | 7,70E-59 |
| ITGAX    | 16p11.2        | 0,698096839 | 7,05E-61 | 1,14E-58 |
| CD226    | 18q22.2        | 0,697403934 | 1,03E-60 | 1,66E-58 |
| SIGLEC1  | 20p13          | 0,69635206  | 1,85E-60 | 2,93E-58 |
| PLEKHO2  | 15q22.31       | 0,695968297 | 2,28E-60 | 3,59E-58 |
| MYO1F    | 19p13.2        | 0,695804508 | 2,50E-60 | 3,90E-58 |
| LAX1     | 1q32.1         | 0,69563618  | 2,74E-60 | 4,25E-58 |
| ITGAM    | 16p11.2        | 0,695463857 | 3,01E-60 | 4,63E-58 |
| ITGAL    | 16p11.2        | 0,694857999 | 4,19E-60 | 6,40E-58 |
| C1QA     | 1p36.12        | 0,694303557 | 5,67E-60 | 8,60E-58 |
| FERMT3   | 11q13.1        | 0,694060259 | 6,48E-60 | 9,75E-58 |
| CD209    | 19p13.2        | 0,693990645 | 6,73E-60 | 1,00E-57 |
| MPP1     | Xq28           | 0,693816432 | 7,40E-60 | 1,10E-57 |
| LILRA6   | 19q13.42       | 0,692911526 | 1,21E-59 | 1,78E-57 |
| SNX20    | 16q12.1        | 0,692072478 | 1,91E-59 | 2,78E-57 |
| GIMAP1   | 7q36.1         | 0,692062112 | 1,92E-59 | 2,78E-57 |
| FCGR2C   | 1q23.3         | 0,690625827 | 4,16E-59 | 5,99E-57 |
| CELF2    | 10p14          | 0,690342775 | 4,84E-59 | 6,92E-57 |
| DOK2     | 8p21.3         | 0,690268214 | 5,04E-59 | 7,13E-57 |
| TBXAS1   | 7q34           | 0,690259556 | 5,06E-59 | 7,13E-57 |
| LAT2     | 7q11.23        | 0,688968684 | 1,01E-58 | 1,41E-56 |
| SH2B3    | 12q24.12       | 0,68884412  | 1,08E-58 | 1,50E-56 |
| TMEM150B | 19q13.42       | 0,688796936 | 1,11E-58 | 1,53E-56 |
| FOLR2    | 11q13.4        | 0,687220725 | 2,56E-58 | 3,51E-56 |
| P2RX7    | 12q24.31       | 0,687185912 | 2,61E-58 | 3,55E-56 |
| VIM      | 10p13          | 0,685251907 | 7,24E-58 | 9,79E-56 |
| LY96     | 8q21.11        | 0,685131584 | 7,71E-58 | 1,04E-55 |
| ARHGAP31 | 3q13.32-q13.33 | 0,685019506 | 8,18E-58 | 1,09E-55 |
| CCR4     | 3p22.3         | 0,684461304 | 1,10E-57 | 1,45E-55 |
| FCGR1A   | 1q21.2         | 0,683960006 | 1,43E-57 | 1,88E-55 |
| GVINP1   | 11p15.4        | 0,683592114 | 1,73E-57 | 2,26E-55 |
| P2RY13   | 3q25.1         | 0,68321324  | 2,11E-57 | 2,74E-55 |
| FCGR2A   | 1q23.3         | 0,682786601 | 2,63E-57 | 3,40E-55 |
| IL21R    | 16p12.1        | 0,682670283 | 2,80E-57 | 3,59E-55 |
| C1ORF162 | 1p13.2         | 0,68216973  | 3,63E-57 | 4,62E-55 |
| ANXA6    | 5q33.1         | 0,682015011 | 3,93E-57 | 4,98E-55 |
| FPR1     | 19q13.41       | 0,681860587 | 4,26E-57 | 5,36E-55 |

|           |              |             |          |          |
|-----------|--------------|-------------|----------|----------|
| ARHGAP15  | 2q22.2-q22.3 | 0,681151367 | 6,15E-57 | 7,69E-55 |
| FAM78A    | 9q34.13      | 0,680664242 | 7,91E-57 | 9,83E-55 |
| CD4       | 12p13.31     | 0,680301152 | 9,54E-57 | 1,18E-54 |
| CD300C    | 17q25.1      | 0,680271924 | 9,68E-57 | 1,19E-54 |
| CD86      | 3q13.33      | 0,679909438 | 1,17E-56 | 1,42E-54 |
| ZC3H12D   | 6q25.1       | 0,679646122 | 1,34E-56 | 1,62E-54 |
| P2RY10    | Xq21.1       | 0,67934031  | 1,56E-56 | 1,89E-54 |
| GIMAP5    | 7q36.1       | 0,678604431 | 2,28E-56 | 2,73E-54 |
| SLAMF1    | 1q23.3       | 0,678311279 | 2,65E-56 | 3,16E-54 |
| NRROS     | 3q29         | 0,677830544 | 3,39E-56 | 4,01E-54 |
| FCGR1BP   | 1p11.2       | 0,677771296 | 3,49E-56 | 4,11E-54 |
| RHOH      | 4p14         | 0,677418806 | 4,18E-56 | 4,89E-54 |
| HLA-DPB1  | 6p21.32      | 0,67669816  | 6,03E-56 | 7,02E-54 |
| CCR5      | 3p21.31      | 0,676479953 | 6,74E-56 | 7,80E-54 |
| NLRP3     | 1q44         | 0,675889054 | 9,10E-56 | 1,05E-53 |
| TAGAP     | 6q25.3       | 0,675543161 | 1,08E-55 | 1,24E-53 |
| RASSF4    | 10q11.21     | 0,674747718 | 1,62E-55 | 1,84E-53 |
| CD300LF   | 17q25.1      | 0,673676821 | 2,78E-55 | 3,14E-53 |
| TMEM273   | 10q11.23     | 0,673569602 | 2,93E-55 | 3,29E-53 |
| ZNF831    | 20q13.32     | 0,672922032 | 4,05E-55 | 4,53E-53 |
| FCGR2B    | 1q23.3       | 0,672584192 | 4,80E-55 | 5,34E-53 |
| DDR2      | 1q23.3       | 0,672158584 | 5,94E-55 | 6,57E-53 |
| DAB2      | 5p13.1       | 0,672060493 | 6,24E-55 | 6,86E-53 |
| HLA-DMB   | 6p21.32      | 0,672000596 | 6,43E-55 | 7,03E-53 |
| GIMAP7    | 7q36.1       | 0,671949711 | 6,59E-55 | 7,17E-53 |
| CXCR4     | 2q22.1       | 0,671938756 | 6,63E-55 | 7,17E-53 |
| IL7R      | 5p13.2       | 0,671890294 | 6,79E-55 | 7,31E-53 |
| TNFSF4    | 1q25.1       | 0,671667896 | 7,59E-55 | 8,12E-53 |
| SH2D1A    | Xq25         | 0,671479434 | 8,33E-55 | 8,87E-53 |
| IL10      | 1q32.1       | 0,671340325 | 8,93E-55 | 9,46E-53 |
| ARHGAP9   | 12q13.3      | 0,671111363 | 1,00E-54 | 1,05E-52 |
| PIP4K2A   | 10p12.2      | 0,670525971 | 1,34E-54 | 1,40E-52 |
| FCGR1CP   | 1q21.1       | 0,670119905 | 1,64E-54 | 1,71E-52 |
| ZEB1      | 10p11.22     | 0,67010104  | 1,65E-54 | 1,71E-52 |
| CD5       | 11q12.2      | 0,670091499 | 1,66E-54 | 1,71E-52 |
| MYO1G     | 7p13         | 0,669911809 | 1,81E-54 | 1,86E-52 |
| TNFAIP8L2 | 1q21.3       | 0,668896215 | 3,00E-54 | 3,06E-52 |
| CST7      | 20p11.21     | 0,668705393 | 3,29E-54 | 3,34E-52 |
| THEMIS2   | 1p35.3       | 0,668504501 | 3,63E-54 | 3,67E-52 |
| LILRB3    | 19q13.42     | 0,667952885 | 4,77E-54 | 4,79E-52 |
| ENTPD1    | 10q24.1      | 0,667875438 | 4,95E-54 | 4,95E-52 |
| STAB1     | 3p21.1       | 0,667638737 | 5,56E-54 | 5,54E-52 |
| HLA-DQA1  | 6p21.32      | 0,6672237   | 6,82E-54 | 6,75E-52 |
| NCF1B     | 7q11.23      | 0,666784311 | 8,45E-54 | 8,33E-52 |
| NCF1      | 7q11.23      | 0,666485475 | 9,78E-54 | 9,59E-52 |
| FAM20A    | 17q24.2      | 0,665742361 | 1,41E-53 | 1,37E-51 |
| ABI3      | 17q21.32     | 0,665194809 | 1,83E-53 | 1,78E-51 |
| GZMK      | 5q11.2       | 0,665132885 | 1,89E-53 | 1,83E-51 |
| P2RY14    | 3q25.1       | 0,664642427 | 2,40E-53 | 2,31E-51 |
| BTLA      | 3q13.2       | 0,663888522 | 3,45E-53 | 3,31E-51 |
| MFNG      | 22q13.1      | 0,663206026 | 4,80E-53 | 4,58E-51 |
| NCF1C     | 7q11.23      | 0,663100705 | 5,05E-53 | 4,79E-51 |
| RTN1      | 14q23.1      | 0,661555361 | 1,06E-52 | 1,00E-50 |
| TMEM176A  | 7q36.1       | 0,661510719 | 1,08E-52 | 1,02E-50 |
| CASS4     | 20q13.31     | 0,661475556 | 1,10E-52 | 1,03E-50 |

|          |          |             |          |          |
|----------|----------|-------------|----------|----------|
| ADORA3   | 1p13.2   | 0,661133964 | 1,30E-52 | 1,21E-50 |
| OLFML3   | 1p13.2   | 0,660934898 | 1,43E-52 | 1,32E-50 |
| HLA-DPA1 | 6p21.32  | 0,660491591 | 1,77E-52 | 1,63E-50 |
| CCR8     | 3p22.1   | 0,66020215  | 2,03E-52 | 1,86E-50 |
| SAMD3    | 6q23.1   | 0,660169891 | 2,06E-52 | 1,88E-50 |
| LY9      | 1q23.3   | 0,659986935 | 2,25E-52 | 2,04E-50 |
| CD300LB  | 17q25.1  | 0,65982574  | 2,42E-52 | 2,20E-50 |
| HCST     | 19q13.12 | 0,659329524 | 3,07E-52 | 2,77E-50 |
| GRAP2    | 22q13.1  | 0,6589525   | 3,67E-52 | 3,29E-50 |
| CXCR3    | Xq13.1   | 0,658684499 | 4,17E-52 | 3,72E-50 |
| CEACAM21 | 19q13.2  | 0,658511003 | 4,53E-52 | 4,03E-50 |
| LST1     | 6p21.33  | 0,658479132 | 4,60E-52 | 4,07E-50 |
| FMNL3    | 12q13.12 | 0,658416232 | 4,73E-52 | 4,17E-50 |
| PLA2G7   | 6p12.3   | 0,658348737 | 4,89E-52 | 4,29E-50 |
| COL15A1  | 9q22.33  | 0,657657363 | 6,78E-52 | 5,92E-50 |
| RECK     | 9p13.3   | 0,65757167  | 7,06E-52 | 6,14E-50 |
| CLEC4E   | 12p13.31 | 0,657172097 | 8,52E-52 | 7,38E-50 |
| TNFRSF1B | 1p36.22  | 0,65706246  | 8,97E-52 | 7,74E-50 |
| SLC24A4  | 14q32.12 | 0,656876196 | 9,79E-52 | 8,41E-50 |
| LRRK2    | 12q12    | 0,656551659 | 1,14E-51 | 9,76E-50 |
| F2R      | 5q13.3   | 0,656516852 | 1,16E-51 | 9,87E-50 |
| ATP10A   | 15q12    | 0,6561474   | 1,38E-51 | 1,17E-49 |
| ECM2     | 9q22.31  | 0,656087444 | 1,42E-51 | 1,20E-49 |
| GAS7     | 17p13.1  | 0,656021953 | 1,46E-51 | 1,23E-49 |
| F13A1    | 6p25.1   | 0,655626705 | 1,76E-51 | 1,47E-49 |
| PLCL1    | 2q33.1   | 0,655589718 | 1,79E-51 | 1,49E-49 |
| TM6SF1   | 15q25.2  | 0,655109043 | 2,24E-51 | 1,86E-49 |
| CD38     | 4p15.32  | 0,654412804 | 3,10E-51 | 2,57E-49 |
| CD14     | 5q31.3   | 0,653836341 | 4,06E-51 | 3,34E-49 |
| CLEC4A   | 12p13.31 | 0,653807658 | 4,12E-51 | 3,38E-49 |
| HLA-DRA  | 6p21.32  | 0,651534999 | 1,18E-50 | 9,63E-49 |
| RGS1     | 1q31.2   | 0,651184807 | 1,39E-50 | 1,13E-48 |
| RASAL3   | 19p13.12 | 0,651144876 | 1,41E-50 | 1,14E-48 |
| PTPN7    | 1q32.1   | 0,651136218 | 1,42E-50 | 1,14E-48 |
| TLR7     | Xp22.2   | 0,651104531 | 1,44E-50 | 1,16E-48 |
| NID2     | 14q22.1  | 0,651078088 | 1,46E-50 | 1,17E-48 |
| CD52     | 1p36.11  | 0,650386714 | 2,00E-50 | 1,59E-48 |
| GNGT2    | 17q21.32 | 0,649775407 | 2,65E-50 | 2,10E-48 |
| GLIPR2   | 9p13.3   | 0,649567949 | 2,91E-50 | 2,30E-48 |
| TREM2    | 6p21.1   | 0,647374032 | 7,91E-50 | 6,24E-48 |
| ADPRH    | 3q13.33  | 0,646888321 | 9,86E-50 | 7,74E-48 |
| CLEC10A  | 17p13.1  | 0,646706001 | 1,07E-49 | 8,38E-48 |
| CNRIP1   | 2p14     | 0,646659512 | 1,09E-49 | 8,52E-48 |
| MS4A7    | 11q12.2  | 0,646645377 | 1,10E-49 | 8,54E-48 |
| FOXP3    | Xp11.23  | 0,646589368 | 1,13E-49 | 8,73E-48 |
| FMNL1    | 17q21.31 | 0,645677312 | 1,71E-49 | 1,31E-47 |
| HSD11B1  | 1q32.2   | 0,645606603 | 1,76E-49 | 1,35E-47 |
| KCNMA1   | 10q22.3  | 0,645529955 | 1,82E-49 | 1,39E-47 |
| CD80     | 3q13.33  | 0,645384836 | 1,95E-49 | 1,48E-47 |
| CCR1     | 3p21.31  | 0,645221284 | 2,09E-49 | 1,59E-47 |
| TNFSF13B | 13q33.3  | 0,644919914 | 2,40E-49 | 1,81E-47 |
| MEF2C    | 5q14.3   | 0,644863964 | 2,46E-49 | 1,85E-47 |
| PYHIN1   | 1q23.1   | 0,644739859 | 2,60E-49 | 1,95E-47 |
| ALOX5AP  | 13q12.3  | 0,644226892 | 3,28E-49 | 2,45E-47 |
| LILRA1   | 19q13.42 | 0,64391508  | 3,77E-49 | 2,80E-47 |

|            |                    |             |          |          |
|------------|--------------------|-------------|----------|----------|
| NLRC4      | 2p22.3             | 0,643604249 | 4,33E-49 | 3,20E-47 |
| ELMO1      | 7p14.2-p14.1       | 0,643600362 | 4,34E-49 | 3,20E-47 |
| HK3        | 5q35.2             | 0,643348111 | 4,86E-49 | 3,57E-47 |
| RSPO3      | 6q22.33            | 0,643141254 | 5,33E-49 | 3,90E-47 |
| CD27       | 12p13.31           | 0,643055461 | 5,53E-49 | 4,04E-47 |
| IGF1       | 12q23.2            | 0,642630382 | 6,69E-49 | 4,87E-47 |
| FBN1       | 15q21.1            | 0,642034036 | 8,73E-49 | 6,33E-47 |
| LILRA2     | 19q13.4            | 0,64124223  | 1,24E-48 | 8,96E-47 |
| C5AR2      | 19q13.32           | 0,641073186 | 1,34E-48 | 9,62E-47 |
| TIGIT      | 3q13.31            | 0,64036367  | 1,83E-48 | 1,31E-46 |
| ADAMTSL1   | 9p22.2-p22.1       | 0,640210836 | 1,96E-48 | 1,40E-46 |
| ADAMDEC1   | 8p21.2             | 0,639147367 | 3,13E-48 | 2,23E-46 |
| ADAP2      | 17q11.2            | 0,638884246 | 3,52E-48 | 2,49E-46 |
| CD93       | 20p11.21           | 0,638234923 | 4,68E-48 | 3,31E-46 |
| PRAM1      | 19p13.2            | 0,637581006 | 6,23E-48 | 4,39E-46 |
| IRF4       | 6p25.3             | 0,637460153 | 6,57E-48 | 4,61E-46 |
| GPRIN3     | 4q22.1             | 0,637382555 | 6,79E-48 | 4,75E-46 |
| CD300A     | 17q25.1            | 0,636408515 | 1,04E-47 | 7,25E-46 |
| GPC6       | 13q31.3-q32.1      | 0,635350869 | 1,65E-47 | 1,14E-45 |
| TXLNB      | 6q24.1             | 0,635061142 | 1,87E-47 | 1,29E-45 |
| COLEC12    | 18p11.32           | 0,634803788 | 2,09E-47 | 1,44E-45 |
| SLIT2      | 4p15.31            | 0,634792258 | 2,10E-47 | 1,44E-45 |
| PDGFRB     | 5q32               | 0,634731937 | 2,15E-47 | 1,48E-45 |
| ARHGAP25   | 2p13.3             | 0,634692503 | 2,19E-47 | 1,50E-45 |
| GIMAP8     | 7q36.1             | 0,634420262 | 2,46E-47 | 1,68E-45 |
| OLFML1     | 11p15.4            | 0,633908577 | 3,07E-47 | 2,09E-45 |
| CXCL12     | 10q11.21           | 0,63333682  | 3,93E-47 | 2,66E-45 |
| NCF2       | 1q25.3             | 0,632631487 | 5,33E-47 | 3,59E-45 |
| CCDC170    | 6q25.1             | 0,632466518 | 5,72E-47 | 3,84E-45 |
| CD3E       | 11q23.3            | 0,632451267 | 5,76E-47 | 3,85E-45 |
| PIK3CG     | 7q22.3             | 0,632152518 | 6,55E-47 | 4,37E-45 |
| HGF        | 7q21.11            | 0,631939833 | 7,17E-47 | 4,77E-45 |
| PCED1B-AS1 | 12q13.11           | 0,631793408 | 7,64E-47 | 5,06E-45 |
| CERKL      | 2q31.3             | 0,631778975 | 7,68E-47 | 5,07E-45 |
| C1S        | 12p13.31           | 0,631088484 | 1,03E-46 | 6,80E-45 |
| DOCK4      | 7q31.1             | 0,630940951 | 1,10E-46 | 7,21E-45 |
| CCDC80     | 3q13.2             | 0,63078211  | 1,18E-46 | 7,70E-45 |
| CSF2RA     | Xp22.32 and Yp11.3 | 0,630238622 | 1,48E-46 | 9,67E-45 |
| ZNF521     | 18q11.2            | 0,630192507 | 1,51E-46 | 9,83E-45 |
| COL6A3     | 2q37.3             | 0,629268083 | 2,24E-46 | 1,45E-44 |
| NEXN       | 1p31.1             | 0,629130119 | 2,38E-46 | 1,53E-44 |
| GPR171     | 3q25.1             | 0,62764209  | 4,46E-46 | 2,87E-44 |
| KCNN3      | 1q21.3             | 0,627446988 | 4,84E-46 | 3,11E-44 |
| CALHM5     | 6q22.1             | 0,627333366 | 5,08E-46 | 3,25E-44 |
| CLEC4D     | 12p13.31           | 0,627289554 | 5,18E-46 | 3,30E-44 |
| TRPV2      | 17p11.2            | 0,627126643 | 5,55E-46 | 3,52E-44 |
| BNC2       | 9p22.3-p22.2       | 0,626851189 | 6,23E-46 | 3,94E-44 |
| TRAT1      | 3q13.13            | 0,62662808  | 6,84E-46 | 4,32E-44 |
| ATP8B2     | 1q21.3             | 0,625463493 | 1,11E-45 | 7,02E-44 |
| IL12RB1    | 19p13.11           | 0,625370318 | 1,16E-45 | 7,27E-44 |
| CD2        | 1p13.1             | 0,624986467 | 1,36E-45 | 8,51E-44 |
| NLRC3      | 16p13.3            | 0,624864349 | 1,43E-45 | 8,93E-44 |
| PMP22      | 17p12              | 0,624650558 | 1,57E-45 | 9,73E-44 |
| PDCD1LG2   | 9p24.1             | 0,624535646 | 1,64E-45 | 1,02E-43 |
| ITGA9      | 3p22.2             | 0,624341004 | 1,78E-45 | 1,10E-43 |

|           |          |             |          |          |
|-----------|----------|-------------|----------|----------|
| S1PR1     | 1p21.2   | 0,624078801 | 1,99E-45 | 1,22E-43 |
| JAKMIP1   | 4p16.1   | 0,623748396 | 2,28E-45 | 1,40E-43 |
| ADAMTS2   | 5q35.3   | 0,623629487 | 2,40E-45 | 1,47E-43 |
| MAP4K1    | 19q13.2  | 0,623466052 | 2,57E-45 | 1,57E-43 |
| SIT1      | 9p13.3   | 0,623439436 | 2,59E-45 | 1,58E-43 |
| HLA-DOA   | 6p21.32  | 0,623235415 | 2,82E-45 | 1,71E-43 |
| VNN1      | 6q23.2   | 0,62303824  | 3,06E-45 | 1,85E-43 |
| BICC1     | 10q21.1  | 0,62277514  | 3,42E-45 | 2,06E-43 |
| PREX1     | 20q13.13 | 0,622559827 | 3,74E-45 | 2,25E-43 |
| EGR2      | 10q21.3  | 0,622230837 | 4,28E-45 | 2,57E-43 |
| FCRL3     | 1q23.1   | 0,622169312 | 4,39E-45 | 2,62E-43 |
| NRP2      | 2q33.3   | 0,622021286 | 4,67E-45 | 2,78E-43 |
| C1R       | 12p13.31 | 0,621615438 | 5,52E-45 | 3,28E-43 |
| FCRL6     | 1q23.2   | 0,621567175 | 5,63E-45 | 3,34E-43 |
| IL16      | 15q25.1  | 0,621468081 | 5,87E-45 | 3,46E-43 |
| CD200R1   | 3q13.2   | 0,621312613 | 6,26E-45 | 3,68E-43 |
| GEM       | 8q22.1   | 0,620781301 | 7,79E-45 | 4,57E-43 |
| CCDC141   | 2q31.2   | 0,620568915 | 8,50E-45 | 4,97E-43 |
| BEST1     | 11q12.3  | 0,620542271 | 8,59E-45 | 5,01E-43 |
| CYSLTR1   | Xq21.1   | 0,620058168 | 1,05E-44 | 6,10E-43 |
| PALD1     | 10q22.1  | 0,619897691 | 1,12E-44 | 6,50E-43 |
| THEMIS    | 6q22.33  | 0,61984894  | 1,14E-44 | 6,61E-43 |
| FCN1      | 9q34.3   | 0,619748082 | 1,19E-44 | 6,87E-43 |
| CD247     | 1q24.2   | 0,619170096 | 1,51E-44 | 8,68E-43 |
| ICOS      | 2q33.2   | 0,619082115 | 1,56E-44 | 8,97E-43 |
| SLA2      | 20q11.23 | 0,619065498 | 1,57E-44 | 9,00E-43 |
| ST6GAL1   | 3q27.3   | 0,617964564 | 2,47E-44 | 1,41E-42 |
| CD3G      | 11q23.3  | 0,617832434 | 2,61E-44 | 1,48E-42 |
| PTPRJ     | 11p11.2  | 0,617577621 | 2,89E-44 | 1,64E-42 |
| OSCAR     | 19q13.42 | 0,617258879 | 3,29E-44 | 1,86E-42 |
| TLR1      | 4p14     | 0,6170935   | 3,52E-44 | 1,98E-42 |
| CDH11     | 16q21    | 0,616909923 | 3,79E-44 | 2,13E-42 |
| UBASH3A   | 21q22.3  | 0,616474818 | 4,52E-44 | 2,54E-42 |
| TNFRSF9   | 1p36.23  | 0,616232247 | 4,99E-44 | 2,79E-42 |
| NTRK1     | 1q23.1   | 0,615926867 | 5,65E-44 | 3,15E-42 |
| HEG1      | 3q21.2   | 0,615886378 | 5,74E-44 | 3,19E-42 |
| ABI3BP    | 3q12.2   | 0,615325222 | 7,20E-44 | 3,99E-42 |
| MOXD1     | 6q23.2   | 0,615211082 | 7,54E-44 | 4,17E-42 |
| EBI3      | 19p13.3  | 0,614095945 | 1,18E-43 | 6,51E-42 |
| GIMAP6    | 7q36.1   | 0,6140082   | 1,22E-43 | 6,73E-42 |
| LINC00426 | 13q12.3  | 0,613993159 | 1,23E-43 | 6,75E-42 |
| TNFRSF8   | 1p36.22  | 0,613596996 | 1,44E-43 | 7,89E-42 |
| TMEM200A  | 6q23.1   | 0,613563596 | 1,46E-43 | 7,98E-42 |
| FLT3      | 13q12.2  | 0,613128578 | 1,74E-43 | 9,47E-42 |
| SCML4     | 6q21     | 0,613105657 | 1,76E-43 | 9,53E-42 |
| JAML      | 11q23.3  | 0,612911684 | 1,90E-43 | 1,03E-41 |
| PRUNE2    | 9q21.2   | 0,612749241 | 2,03E-43 | 1,09E-41 |
| C4A       | 6p21.33  | 0,612686939 | 2,08E-43 | 1,12E-41 |
| PDGFRA    | 4q12     | 0,61261167  | 2,14E-43 | 1,15E-41 |
| FGFR1     | 8p11.23  | 0,611976129 | 2,76E-43 | 1,48E-41 |
| AXL       | 19q13.2  | 0,611862166 | 2,89E-43 | 1,54E-41 |
| GPR174    | Xq21.1   | 0,611064594 | 3,97E-43 | 2,11E-41 |
| STK32B    | 4p16.2   | 0,610718705 | 4,55E-43 | 2,42E-41 |
| KCTD12    | 13q22.3  | 0,610587373 | 4,80E-43 | 2,54E-41 |
| CYSLTR2   | 13q14.2  | 0,610530116 | 4,91E-43 | 2,59E-41 |

|            |                 |             |          |          |
|------------|-----------------|-------------|----------|----------|
| CCL23      | 17q12           | 0,610019026 | 6,01E-43 | 3,16E-41 |
| FYN        | 6q21            | 0,609690363 | 6,84E-43 | 3,59E-41 |
| TOX        | 8q12.1          | 0,609597514 | 7,10E-43 | 3,72E-41 |
| ACAP1      | 17p13.1         | 0,609509232 | 7,35E-43 | 3,84E-41 |
| SYNE3      | 14q32.13        | 0,609485026 | 7,42E-43 | 3,87E-41 |
| SIGLEC8    | 19q13.33-q13.41 | 0,609475803 | 7,45E-43 | 3,87E-41 |
| GLT8D2     | 12q23.3         | 0,60934509  | 7,84E-43 | 4,07E-41 |
| TCF4       | 18q21.2         | 0,608800012 | 9,73E-43 | 5,03E-41 |
| PAPSS2     | 10q23.2-q23.31  | 0,60872068  | 1,00E-42 | 5,18E-41 |
| KCNAB2     | 1p36.31         | 0,608660077 | 1,03E-42 | 5,29E-41 |
| RNASE2     | 14q11.2         | 0,608345916 | 1,16E-42 | 5,97E-41 |
| GAPT       | 5q11.2          | 0,608239334 | 1,21E-42 | 6,21E-41 |
| MAFB       | 20q12           | 0,607846082 | 1,42E-42 | 7,23E-41 |
| LGI2       | 4p15.2          | 0,607757032 | 1,47E-42 | 7,46E-41 |
| CXCR6      | 3p21.31         | 0,607754735 | 1,47E-42 | 7,46E-41 |
| CD1D       | 1q23.1          | 0,607742544 | 1,48E-42 | 7,47E-41 |
| ITGB3      | 17q21.32        | 0,607546245 | 1,59E-42 | 8,05E-41 |
| CCL2       | 17q12           | 0,607307542 | 1,75E-42 | 8,82E-41 |
| PALM2AKAP2 | 9q31.3          | 0,607213616 | 1,82E-42 | 9,13E-41 |
| CCN4       | 8q24.22         | 0,607110298 | 1,89E-42 | 9,48E-41 |
| VENTX      | 10q26.3         | 0,606901497 | 2,05E-42 | 1,03E-40 |
| BCL2A1     | 15q25.1         | 0,606825455 | 2,11E-42 | 1,05E-40 |
| AOX1       | 2q33.1          | 0,606736275 | 2,19E-42 | 1,09E-40 |
| ANKRD29    | 18q11.2         | 0,60666998  | 2,25E-42 | 1,12E-40 |
| DNAJC5B    | 8q13.1          | 0,606649113 | 2,26E-42 | 1,12E-40 |
| GFPT2      | 5q35.3          | 0,606240708 | 2,66E-42 | 1,31E-40 |
| SAMHD1     | 20q11.23        | 0,606067202 | 2,84E-42 | 1,40E-40 |
| LAPTM5     | 1p35.2          | 0,606039109 | 2,87E-42 | 1,41E-40 |
| JAM2       | 21q21.3         | 0,605576544 | 3,44E-42 | 1,69E-40 |
| DOK3       | 5q35.3          | 0,60538961  | 3,70E-42 | 1,81E-40 |
| IFI30      | 19p13.11        | 0,604971393 | 4,36E-42 | 2,13E-40 |
| OLFML2B    | 1q23.3          | 0,604828453 | 4,61E-42 | 2,24E-40 |
| FAM124A    | 13q14.3         | 0,604810276 | 4,64E-42 | 2,25E-40 |
| CD22       | 19q13.12        | 0,604252739 | 5,76E-42 | 2,79E-40 |
| MYLK       | 3q21.1          | 0,603929649 | 6,53E-42 | 3,16E-40 |
| TSPAN4     | 11p15.5         | 0,60382028  | 6,81E-42 | 3,29E-40 |
| TIMP2      | 17q25.3         | 0,603594651 | 7,44E-42 | 3,58E-40 |
| LILRA5     | 19q13.42        | 0,603576219 | 7,49E-42 | 3,59E-40 |
| DYSF       | 2p13.2          | 0,60343475  | 7,91E-42 | 3,79E-40 |
| PTGER2     | 14q22.1         | 0,603239008 | 8,53E-42 | 4,08E-40 |
| CSF1       | 1p13.3          | 0,603020774 | 9,28E-42 | 4,42E-40 |
| TBC1D10C   | 11q13.2         | 0,602846561 | 9,93E-42 | 4,72E-40 |
| IL2RB      | 22q12.3         | 0,6028114   | 1,01E-41 | 4,77E-40 |
| PDCD1      | 2q37.3          | 0,602728059 | 1,04E-41 | 4,92E-40 |
| ANKRD44    | 2q33.1          | 0,60242678  | 1,17E-41 | 5,51E-40 |
| LGALS2     | 22q13.1         | 0,602201594 | 1,27E-41 | 6,00E-40 |
| PLA2G2D    | 1p36.12         | 0,602021403 | 1,37E-41 | 6,41E-40 |
| JAZF1      | 7p15.2-p15.1    | 0,601816302 | 1,48E-41 | 6,92E-40 |
| DCLK1      | 13q13.3         | 0,601780485 | 1,50E-41 | 7,00E-40 |
| LTA        | 6p21.33         | 0,601313341 | 1,79E-41 | 8,36E-40 |
| CLIC2      | Xq28            | 0,601039765 | 1,99E-41 | 9,26E-40 |
| EBF1       | 5q33.3          | 0,600952835 | 2,06E-41 | 9,56E-40 |
| DPYSL2     | 8p21.2          | 0,600724733 | 2,25E-41 | 1,04E-39 |
| HLA-DQA2   | 6p21.32         | 0,600621018 | 2,34E-41 | 1,08E-39 |
| CLECL1     | 12p13.31        | 0,600605183 | 2,35E-41 | 1,08E-39 |

|          |               |             |          |          |
|----------|---------------|-------------|----------|----------|
| P2RX1    | 17p13.2       | 0,600527816 | 2,42E-41 | 1,11E-39 |
| HS3ST3B1 | 17p12         | 0,600305245 | 2,64E-41 | 1,21E-39 |
| CD8A     | 2p11.2        | 0,600123115 | 2,83E-41 | 1,29E-39 |
| TESPA1   | 12q13.2       | 0,600033632 | 2,93E-41 | 1,34E-39 |
| COL14A1  | 8q24.12       | 0,59989996  | 3,08E-41 | 1,40E-39 |
| SLC8A1   | 2p22.1        | 0,599747656 | 3,26E-41 | 1,48E-39 |
| LIX1L    | 1q21.1        | 0,599409655 | 3,71E-41 | 1,69E-39 |
| MSRB3    | 12q14.3       | 0,599278907 | 3,90E-41 | 1,77E-39 |
| TRAF3IP3 | 1q32.2        | 0,599211086 | 4,01E-41 | 1,81E-39 |
| EMILIN1  | 2p23.3        | 0,599146215 | 4,11E-41 | 1,85E-39 |
| CALD1    | 7q33          | 0,598702026 | 4,86E-41 | 2,19E-39 |
| RAB3IL1  | 11q12.2-q12.3 | 0,598407692 | 5,44E-41 | 2,44E-39 |
| ALDH1L2  | 12q23.3       | 0,598087978 | 6,14E-41 | 2,75E-39 |
| APOE     | 19q13.32      | 0,598054293 | 6,22E-41 | 2,78E-39 |
| FPR2     | 19q13.41      | 0,598028506 | 6,28E-41 | 2,80E-39 |
| CRTAM    | 11q24.1       | 0,597962957 | 6,44E-41 | 2,86E-39 |
| MIR100HG | 11q24.1       | 0,597733607 | 7,03E-41 | 3,12E-39 |
| LMCD1    | 3p25.3        | 0,597647031 | 7,26E-41 | 3,21E-39 |
| PTGDR    | 14q22.1       | 0,597528313 | 7,59E-41 | 3,35E-39 |
| RHOJ     | 14q23.2       | 0,597451439 | 7,82E-41 | 3,45E-39 |
| PRRX1    | 1q24.2        | 0,59737829  | 8,04E-41 | 3,54E-39 |
| FBLN5    | 14q32.12      | 0,597306026 | 8,26E-41 | 3,63E-39 |
| NAPSB    | 19q13.33      | 0,597264001 | 8,39E-41 | 3,68E-39 |
| CD79B    | 17q23.3       | 0,597123685 | 8,85E-41 | 3,87E-39 |
| CLMP     | 11q24.1       | 0,597044847 | 9,12E-41 | 3,98E-39 |
| SIRPB2   | 20p13         | 0,596895936 | 9,65E-41 | 4,20E-39 |
| ZAP70    | 2q11.2        | 0,596843133 | 9,84E-41 | 4,27E-39 |
| CMAHP    | 6p22.3        | 0,596577547 | 1,09E-40 | 4,71E-39 |
| IL2RG    | Xq13.1        | 0,596376655 | 1,17E-40 | 5,07E-39 |
| TBX21    | 17q21.32      | 0,596182166 | 1,26E-40 | 5,45E-39 |
| ST8SIA4  | 5q21.1        | 0,596019951 | 1,34E-40 | 5,78E-39 |
| TMEM106A | 17q21.31      | 0,595923807 | 1,39E-40 | 5,98E-39 |
| LRRC2    | 3p21.31       | 0,5958542   | 1,43E-40 | 6,13E-39 |
| CTSK     | 1q21.3        | 0,595584216 | 1,58E-40 | 6,77E-39 |
| TGFB3    | 14q24.3       | 0,595342862 | 1,73E-40 | 7,39E-39 |
| MEI1     | 22q13.2       | 0,595290739 | 1,77E-40 | 7,52E-39 |
| CD72     | 9p13.3        | 0,595016875 | 1,96E-40 | 8,32E-39 |
| CCL8     | 17q12         | 0,594970845 | 1,99E-40 | 8,45E-39 |
| FSTL1    | 3q13.33       | 0,594838069 | 2,09E-40 | 8,86E-39 |
| DCN      | 12q21.33      | 0,594159769 | 2,70E-40 | 1,14E-38 |
| FMOD     | 1q32.1        | 0,593246123 | 3,80E-40 | 1,60E-38 |
| SIGLEC11 | 19q13.33      | 0,593243556 | 3,81E-40 | 1,60E-38 |
| ADAMTS12 | 5p13.3-p13.2  | 0,593226176 | 3,83E-40 | 1,61E-38 |
| PLA2G4C  | 19q13.33      | 0,593131392 | 3,97E-40 | 1,66E-38 |
| HSPA12B  | 20p13         | 0,593014487 | 4,15E-40 | 1,73E-38 |
| FAIM2    | 12q13.12      | 0,592998323 | 4,17E-40 | 1,74E-38 |
| RASGRP2  | 11q13.1       | 0,591564421 | 7,11E-40 | 2,96E-38 |
| LRRC32   | 11q13.5       | 0,590735055 | 9,67E-40 | 4,01E-38 |
| TMEM255A | Xq24          | 0,590612634 | 1,01E-39 | 4,19E-38 |
| CRYBB1   | 22q12.1       | 0,590573578 | 1,03E-39 | 4,24E-38 |
| COL8A1   | 3q12.1        | 0,590317721 | 1,13E-39 | 4,65E-38 |
| CPED1    | 7q31.31       | 0,590249344 | 1,16E-39 | 4,76E-38 |
| RASGRF2  | 5q14.1        | 0,590142095 | 1,20E-39 | 4,95E-38 |
| CCL4     | 17q12         | 0,590011285 | 1,26E-39 | 5,18E-38 |
| CRISPLD2 | 16q24.1       | 0,589672992 | 1,43E-39 | 5,86E-38 |

|           |                |             |          |          |
|-----------|----------------|-------------|----------|----------|
| HLA-DRB1  | 6p21.32        | 0,589644369 | 1,45E-39 | 5,91E-38 |
| HIC1      | 17p13.3        | 0,589248945 | 1,67E-39 | 6,82E-38 |
| CYBRD1    | 2q31.1         | 0,589219968 | 1,69E-39 | 6,88E-38 |
| PDE1A     | 2q32.1         | 0,589201795 | 1,70E-39 | 6,91E-38 |
| GZMM      | 19p13.3        | 0,589136791 | 1,74E-39 | 7,06E-38 |
| TIFAB     | 5q31.1         | 0,589055881 | 1,80E-39 | 7,26E-38 |
| FAM20C    | 7p22.3         | 0,588813412 | 1,96E-39 | 7,92E-38 |
| TMEM26    | 10q21.2        | 0,588681454 | 2,06E-39 | 8,30E-38 |
| SEPTIN6   | Xq24           | 0,588466753 | 2,23E-39 | 8,96E-38 |
| TEK       | 9p21.2         | 0,588377173 | 2,31E-39 | 9,25E-38 |
| FILIP1L   | 3q12.1         | 0,588180521 | 2,48E-39 | 9,92E-38 |
| ADAM12    | 10q26.2        | 0,588070269 | 2,58E-39 | 1,03E-37 |
| RUNX3     | 1p36.11        | 0,587752057 | 2,90E-39 | 1,16E-37 |
| KIAA1755  | 20q11.23       | 0,587588131 | 3,08E-39 | 1,22E-37 |
| SFMBT2    | 10p14          | 0,587352153 | 3,36E-39 | 1,33E-37 |
| C11ORF21  | 11p15.5        | 0,587241299 | 3,50E-39 | 1,38E-37 |
| GLIPR1    | 12q21.2        | 0,587154503 | 3,61E-39 | 1,43E-37 |
| DCSTAMP   | 8q22.3         | 0,587051543 | 3,75E-39 | 1,48E-37 |
| ICAM1     | 19p13.2        | 0,587038534 | 3,76E-39 | 1,48E-37 |
| PEAK3     | 19p13.3        | 0,586467107 | 4,64E-39 | 1,82E-37 |
| LINC02908 | 9q34.3         | 0,586354516 | 4,83E-39 | 1,90E-37 |
| MEOX2     | 7p21.2         | 0,586317197 | 4,90E-39 | 1,92E-37 |
| FUT7      | 9q34.3         | 0,585956609 | 5,58E-39 | 2,18E-37 |
| SSTR2     | 17q25.1        | 0,585908296 | 5,68E-39 | 2,22E-37 |
| CXCL9     | 4q21.1         | 0,585780765 | 5,95E-39 | 2,32E-37 |
| RUNX1T1   | 8q21.3         | 0,58569205  | 6,15E-39 | 2,39E-37 |
| SPOCK2    | 10q22.1        | 0,585195403 | 7,36E-39 | 2,86E-37 |
| GUCY1A1   | 4q32.1         | 0,58486818  | 8,29E-39 | 3,21E-37 |
| ANK2      | 4q25-q26       | 0,584609437 | 9,11E-39 | 3,52E-37 |
| KLRD1     | 12p13.2        | 0,584082258 | 1,10E-38 | 4,25E-37 |
| HLA-DRB6  | 6p21.32        | 0,583904531 | 1,18E-38 | 4,52E-37 |
| SLC2A5    | 1p36.23        | 0,583770603 | 1,23E-38 | 4,74E-37 |
| COL1A2    | 7q21.3         | 0,583632611 | 1,30E-38 | 4,97E-37 |
| APBB1IP   | 10p12.1        | 0,583492675 | 1,36E-38 | 5,22E-37 |
| ADGRA2    | 8p11.23        | 0,583467409 | 1,38E-38 | 5,26E-37 |
| C1ORF54   | 1q21.2         | 0,583377652 | 1,42E-38 | 5,42E-37 |
| TNFAIP6   | 2q23.3         | 0,583086024 | 1,58E-38 | 6,01E-37 |
| ITGA1     | 5q11.2         | 0,582577969 | 1,90E-38 | 7,20E-37 |
| EPB41L3   | 18p11.31       | 0,582554116 | 1,91E-38 | 7,25E-37 |
| CTLA4     | 2q33.2         | 0,582449091 | 1,99E-38 | 7,51E-37 |
| SPARC     | 5q33.1         | 0,582411707 | 2,01E-38 | 7,60E-37 |
| DIXDC1    | 11q23.1        | 0,582393685 | 2,03E-38 | 7,64E-37 |
| RGL1      | 1q25.3         | 0,58235075  | 2,06E-38 | 7,74E-37 |
| KCNJ8     | 12p12.1        | 0,582225126 | 2,15E-38 | 8,08E-37 |
| ROR2      | 9q22.31        | 0,581791361 | 2,52E-38 | 9,43E-37 |
| PTGFR     | 1p31.1         | 0,581422704 | 2,87E-38 | 1,07E-36 |
| GBP5      | 1p22.2         | 0,581420849 | 2,87E-38 | 1,07E-36 |
| TGM2      | 20q11.23       | 0,581416432 | 2,88E-38 | 1,07E-36 |
| MSC       | 8q13.3         | 0,581294809 | 3,01E-38 | 1,12E-36 |
| CPA3      | 3q24           | 0,58121477  | 3,09E-38 | 1,15E-36 |
| ACSM5     | 16p12.3        | 0,581206886 | 3,10E-38 | 1,15E-36 |
| COL6A2    | 21q22.3        | 0,581079314 | 3,25E-38 | 1,20E-36 |
| BATF3     | 1q32.3         | 0,581028012 | 3,31E-38 | 1,22E-36 |
| FMO2      | 1q24.3         | 0,580921996 | 3,43E-38 | 1,27E-36 |
| EDNRA     | 4q31.22-q31.23 | 0,580747674 | 3,66E-38 | 1,34E-36 |

|          |              |             |          |          |
|----------|--------------|-------------|----------|----------|
| ACVRL1   | 12q13.13     | 0,580707036 | 3,71E-38 | 1,36E-36 |
| SULF1    | 8q13.2-q13.3 | 0,580634241 | 3,81E-38 | 1,40E-36 |
| COL3A1   | 2q32.2       | 0,580479287 | 4,02E-38 | 1,47E-36 |
| SIRPA    | 20p13        | 0,580228569 | 4,40E-38 | 1,61E-36 |
| CCL19    | 9p13.3       | 0,580207174 | 4,43E-38 | 1,62E-36 |
| KCNE4    | 2q36.1       | 0,580177683 | 4,48E-38 | 1,63E-36 |
| ADAMTS4  | 1q23.3       | 0,58012185  | 4,57E-38 | 1,66E-36 |
| EOMES    | 3p24.1       | 0,579728216 | 5,26E-38 | 1,91E-36 |
| FGF7     | 15q21.2      | 0,57961476  | 5,48E-38 | 1,98E-36 |
| FYB1     | 5p13.1       | 0,579430299 | 5,85E-38 | 2,11E-36 |
| CD200    | 3q13.2       | 0,578537326 | 8,03E-38 | 2,90E-36 |
| CADM3    | 1q23.2       | 0,578462511 | 8,25E-38 | 2,97E-36 |
| NEFH     | 22q12.2      | 0,578085401 | 9,43E-38 | 3,39E-36 |
| LEF1     | 4q25         | 0,577612018 | 1,11E-37 | 4,00E-36 |
| DENND5A  | 11p15.4      | 0,577476676 | 1,17E-37 | 4,19E-36 |
| SH3RF3   | 2q13         | 0,577462718 | 1,18E-37 | 4,20E-36 |
| CD6      | 11q12.2      | 0,577268893 | 1,26E-37 | 4,49E-36 |
| PIPOX    | 17q11.2      | 0,577024602 | 1,37E-37 | 4,88E-36 |
| GPR132   | 14q32.33     | 0,576925591 | 1,42E-37 | 5,05E-36 |
| SIRPB1   | 20p13        | 0,576899909 | 1,43E-37 | 5,09E-36 |
| SDS      | 12q24.13     | 0,576487409 | 1,66E-37 | 5,87E-36 |
| CEACAM4  | 19q13.2      | 0,576471718 | 1,67E-37 | 5,89E-36 |
| SLC2A3   | 12p13.31     | 0,576421151 | 1,70E-37 | 5,99E-36 |
| SNED1    | 2q37.3       | 0,576045516 | 1,94E-37 | 6,82E-36 |
| GUCY1B1  | 4q32.1       | 0,575682425 | 2,20E-37 | 7,74E-36 |
| ABCC9    | 12p12.1      | 0,575426936 | 2,41E-37 | 8,45E-36 |
| PRF1     | 10q22.1      | 0,575147418 | 2,66E-37 | 9,30E-36 |
| LOXL3    | 2p13.1       | 0,575122682 | 2,68E-37 | 9,37E-36 |
| PDLIM3   | 4q35.1       | 0,575111021 | 2,69E-37 | 9,39E-36 |
| F2RL2    | 5q13.3       | 0,574818052 | 2,98E-37 | 1,04E-35 |
| CPXM1    | 20p13        | 0,574681849 | 3,13E-37 | 1,09E-35 |
| TLN1     | 9p13.3       | 0,574189071 | 3,71E-37 | 1,29E-35 |
| FILIP1   | 6q14.1       | 0,574071474 | 3,87E-37 | 1,34E-35 |
| CCN1     | 1p22.3       | 0,574019098 | 3,94E-37 | 1,36E-35 |
| FNBP1    | 9q34.11      | 0,573979167 | 4,00E-37 | 1,38E-35 |
| ARSB     | 5q14.1       | 0,573829867 | 4,21E-37 | 1,45E-35 |
| VNN2     | 6q23.2       | 0,573439138 | 4,82E-37 | 1,66E-35 |
| HLA-DQB1 | 6p21.32      | 0,573260583 | 5,13E-37 | 1,77E-35 |
| FBXL7    | 5p15.1       | 0,5730816   | 5,46E-37 | 1,88E-35 |
| EMP3     | 19q13.33     | 0,573040962 | 5,54E-37 | 1,90E-35 |
| ADORA2A  | 22q11.23     | 0,572707201 | 6,22E-37 | 2,13E-35 |
| FAM124B  | 2q36.2       | 0,57270031  | 6,24E-37 | 2,13E-35 |
| AEBP1    | 7p13         | 0,572501538 | 6,69E-37 | 2,28E-35 |
| TSPAN32  | 11p15.5      | 0,571972239 | 8,03E-37 | 2,73E-35 |
| CREB5    | 7p15.1-p14.3 | 0,57183278  | 8,43E-37 | 2,87E-35 |
| LUM      | 12q21.33     | 0,571283461 | 1,02E-36 | 3,46E-35 |
| LCK      | 1p35.2       | 0,571071438 | 1,10E-36 | 3,72E-35 |
| SERPING1 | 11q12.1      | 0,571027973 | 1,11E-36 | 3,77E-35 |
| MARCHF1  | 4q32.2-q32.3 | 0,570412574 | 1,38E-36 | 4,65E-35 |
| CCN2     | 6q23.2       | 0,570256029 | 1,45E-36 | 4,90E-35 |
| AKT3     | 1q43-q44     | 0,570201963 | 1,48E-36 | 4,98E-35 |
| SH2D3C   | 9q34.11      | 0,570171333 | 1,50E-36 | 5,03E-35 |
| RASL12   | 15q22.31     | 0,569810779 | 1,70E-36 | 5,68E-35 |
| HEPH     | Xq12         | 0,569764841 | 1,72E-36 | 5,77E-35 |
| CYP27A1  | 2q35         | 0,569694166 | 1,77E-36 | 5,90E-35 |

|            |                |             |          |          |
|------------|----------------|-------------|----------|----------|
| CYRIA      | 2p24.2         | 0,569513593 | 1,88E-36 | 6,26E-35 |
| PDZRN3     | 3p13           | 0,569303336 | 2,02E-36 | 6,72E-35 |
| ADAM19     | 5q33.3         | 0,5691922   | 2,10E-36 | 6,97E-35 |
| TNFRSF4    | 1p36.33        | 0,569166227 | 2,12E-36 | 7,02E-35 |
| CSGALNACT2 | 10q11.21       | 0,569060745 | 2,19E-36 | 7,27E-35 |
| POU2F2     | 19q13.2        | 0,568857202 | 2,35E-36 | 7,78E-35 |
| DCANP1     | 5q31.1         | 0,56881544  | 2,39E-36 | 7,88E-35 |
| LHFPL6     | 13q13.3-q14.11 | 0,568255231 | 2,89E-36 | 9,54E-35 |
| KCNMB1     | 5q35.1         | 0,568141735 | 3,01E-36 | 9,88E-35 |
| SHE        | 1q21.3         | 0,568141269 | 3,01E-36 | 9,88E-35 |
| DOK5       | 20q13.2        | 0,567928216 | 3,24E-36 | 1,06E-34 |
| VASH1      | 14q24.3        | 0,567586826 | 3,64E-36 | 1,19E-34 |
| PKDCC      | 2p21           | 0,567522714 | 3,72E-36 | 1,22E-34 |
| GXYLT2     | 3p13           | 0,567508374 | 3,74E-36 | 1,22E-34 |
| POSTN      | 13q13.3        | 0,567289993 | 4,02E-36 | 1,31E-34 |
| CD40LG     | Xq26.3         | 0,566830312 | 4,71E-36 | 1,53E-34 |
| PTGIR      | 19q13.32       | 0,566798565 | 4,76E-36 | 1,55E-34 |
| VCAN       | 5q14.2-q14.3   | 0,566202488 | 5,83E-36 | 1,89E-34 |
| MAP1B      | 5q13.2         | 0,566182699 | 5,87E-36 | 1,90E-34 |
| A2M        | 12p13.31       | 0,565966081 | 6,32E-36 | 2,04E-34 |
| FERMT2     | 14q22.1        | 0,56559716  | 7,16E-36 | 2,31E-34 |
| ADAMTS10   | 19p13.2        | 0,565579163 | 7,20E-36 | 2,32E-34 |
| NKG7       | 19q13.41       | 0,565490378 | 7,42E-36 | 2,39E-34 |
| ARHGAP20   | 11q22.3-q23.1  | 0,565189657 | 8,22E-36 | 2,64E-34 |
| SCN1B      | 19q13.11       | 0,565001373 | 8,76E-36 | 2,81E-34 |
| HRH2       | 5q35.2         | 0,564949136 | 8,92E-36 | 2,86E-34 |
| GPR176     | 15q14-q15.1    | 0,564890237 | 9,10E-36 | 2,91E-34 |
| GRK5       | 10q26.11       | 0,564567784 | 1,01E-35 | 3,24E-34 |
| MRO        | 18q21.2        | 0,564542519 | 1,02E-35 | 3,26E-34 |
| LAMA4      | 6q21           | 0,564306818 | 1,11E-35 | 3,53E-34 |
| CLIC4      | 1p36.11        | 0,564037901 | 1,21E-35 | 3,86E-34 |
| BOC        | 3q13.2         | 0,563894609 | 1,27E-35 | 4,04E-34 |
| FAP        | 2q24.2         | 0,563836479 | 1,30E-35 | 4,11E-34 |
| RGS2       | 1q31.2         | 0,563752553 | 1,34E-35 | 4,22E-34 |
| RFTN1      | 3p24.3         | 0,563616504 | 1,40E-35 | 4,42E-34 |
| KLRG1      | 12p13.31       | 0,56351364  | 1,45E-35 | 4,56E-34 |
| MIR155HG   | 21q21.3        | 0,56342197  | 1,49E-35 | 4,70E-34 |
| NTNG2      | 9q34.13        | 0,563308009 | 1,55E-35 | 4,88E-34 |
| CORO1A     | 16p11.2        | 0,563293875 | 1,56E-35 | 4,89E-34 |
| SHISAL1    | 22q13.31       | 0,563265251 | 1,57E-35 | 4,93E-34 |
| TNFAIP8L3  | 15q21.2        | 0,563222341 | 1,60E-35 | 5,00E-34 |
| SARDH      | 9q34.2         | 0,563123372 | 1,65E-35 | 5,16E-34 |
| FNDC1      | 6q25.3         | 0,563072819 | 1,68E-35 | 5,24E-34 |
| CEBPE      | 14q11.2        | 0,562822011 | 1,83E-35 | 5,69E-34 |
| ZNF469     | 16q24.2        | 0,56280675  | 1,84E-35 | 5,71E-34 |
| PLCB2      | 15q15.1        | 0,56251398  | 2,03E-35 | 6,29E-34 |
| UNC5A      | 5q35.2         | 0,562361981 | 2,13E-35 | 6,61E-34 |
| PLA1A      | 3q13.33        | 0,562278846 | 2,19E-35 | 6,79E-34 |
| MRAS       | 3q22.3         | 0,561910419 | 2,48E-35 | 7,67E-34 |
| GPBAR1     | 2q35           | 0,561802994 | 2,57E-35 | 7,94E-34 |
| CCR6       | 6q27           | 0,561742214 | 2,63E-35 | 8,09E-34 |
| SLC2A14    | 12p13.31       | 0,56166073  | 2,70E-35 | 8,30E-34 |
| PCDHGA12   | 5q31.3         | 0,561566399 | 2,79E-35 | 8,55E-34 |
| CD74       | 5q33.1         | 0,56138301  | 2,96E-35 | 9,08E-34 |
| CLEC7A     | 12p13.2        | 0,56097133  | 3,40E-35 | 1,04E-33 |

|           |              |             |          |          |
|-----------|--------------|-------------|----------|----------|
| KLRB1     | 12p13.31     | 0,560935229 | 3,44E-35 | 1,05E-33 |
| CXCR5     | 11q23.3      | 0,560781063 | 3,62E-35 | 1,11E-33 |
| FCRL5     | 1q23.1       | 0,560680908 | 3,75E-35 | 1,14E-33 |
| DCHS1     | 11p15.4      | 0,560480319 | 4,00E-35 | 1,22E-33 |
| SYNPO     | 5q33.1       | 0,560465477 | 4,02E-35 | 1,22E-33 |
| ZFPM2     | 8q23         | 0,560225007 | 4,36E-35 | 1,32E-33 |
| RAB39A    | 11q22.3      | 0,559666687 | 5,25E-35 | 1,59E-33 |
| XPNPEP2   | Xq26.1       | 0,55960442  | 5,36E-35 | 1,62E-33 |
| VSTM4     | 10q11.23     | 0,559487694 | 5,57E-35 | 1,68E-33 |
| MAMLD1    | Xq28         | 0,559427974 | 5,69E-35 | 1,71E-33 |
| RASGRP1   | 15q14        | 0,559378261 | 5,78E-35 | 1,74E-33 |
| SIGLEC17P | 19q13.41     | 0,558790137 | 7,03E-35 | 2,11E-33 |
| CFP       | Xp11.23      | 0,558473891 | 7,80E-35 | 2,34E-33 |
| IGSF21    | 1p36.13      | 0,558098488 | 8,84E-35 | 2,65E-33 |
| FGF2      | 4q28.1       | 0,558079149 | 8,89E-35 | 2,66E-33 |
| KLF9      | 9q21.12      | 0,557895572 | 9,45E-35 | 2,82E-33 |
| KLRK1     | 12p13.2      | 0,557788323 | 9,79E-35 | 2,92E-33 |
| XIRP1     | 3p22.2       | 0,557594512 | 1,04E-34 | 3,11E-33 |
| BACH2     | 6q15         | 0,557380001 | 1,12E-34 | 3,33E-33 |
| CCL18     | 17q12        | 0,557230489 | 1,18E-34 | 3,49E-33 |
| SP140     | 2q37.1       | 0,55713905  | 1,21E-34 | 3,60E-33 |
| STARD13   | 13q13.1      | 0,556694482 | 1,40E-34 | 4,16E-33 |
| BIN1      | 2q14.3       | 0,556523425 | 1,49E-34 | 4,39E-33 |
| LTB       | 6p21.33      | 0,556427508 | 1,53E-34 | 4,53E-33 |
| DPP4      | 2q24.2       | 0,55615309  | 1,68E-34 | 4,95E-33 |
| NNMT      | 11q23.2      | 0,556024109 | 1,75E-34 | 5,15E-33 |
| P4HA3     | 11q13.4      | 0,556021635 | 1,75E-34 | 5,15E-33 |
| CLEC6A    | 12p13.31     | 0,555981698 | 1,78E-34 | 5,21E-33 |
| RASGEF1B  | 4q21.21      | 0,555926224 | 1,81E-34 | 5,30E-33 |
| PTGDS     | 9q34.3       | 0,555288916 | 2,23E-34 | 6,52E-33 |
| MEDAG     | 13q12.3      | 0,555251812 | 2,26E-34 | 6,59E-33 |
| JCAD      | 10p11.23     | 0,555121947 | 2,35E-34 | 6,87E-33 |
| SPARCL1   | 4q22.1       | 0,55500074  | 2,45E-34 | 7,13E-33 |
| RASA3     | 13q34        | 0,554771225 | 2,64E-34 | 7,68E-33 |
| CD7       | 17q25.3      | 0,554338696 | 3,04E-34 | 8,83E-33 |
| STAP1     | 4q13.2       | 0,554286766 | 3,09E-34 | 8,97E-33 |
| TNS1      | 2q35         | 0,554189926 | 3,19E-34 | 9,25E-33 |
| ADGRG5    | 16q21        | 0,554050098 | 3,34E-34 | 9,66E-33 |
| ANPEP     | 15q26.1      | 0,553797682 | 3,63E-34 | 1,05E-32 |
| CCDC102B  | 18q22.1      | 0,553725417 | 3,71E-34 | 1,07E-32 |
| ADGRE4P   | 19p13.2      | 0,553511046 | 3,98E-34 | 1,15E-32 |
| PLXND1    | 3q22.1       | 0,553498905 | 4,00E-34 | 1,15E-32 |
| ANKRD55   | 5q11.2       | 0,553148565 | 4,48E-34 | 1,29E-32 |
| COL8A2    | 1p34.3       | 0,552952237 | 4,78E-34 | 1,37E-32 |
| PXDN      | 2p25.3       | 0,55288545  | 4,88E-34 | 1,40E-32 |
| TLR10     | 4p14         | 0,552822116 | 4,98E-34 | 1,43E-32 |
| PTGS1     | 9q33.2       | 0,552723428 | 5,15E-34 | 1,47E-32 |
| EPB41L2   | 6q23.1-q23.2 | 0,552653637 | 5,27E-34 | 1,50E-32 |
| ITGA11    | 15q23        | 0,552562957 | 5,42E-34 | 1,54E-32 |
| ADAMTS6   | 5q12.3       | 0,552370506 | 5,77E-34 | 1,64E-32 |
| PECAM1    | 17q23.3      | 0,552141423 | 6,22E-34 | 1,76E-32 |
| CD3D      | 11q23.3      | 0,552120495 | 6,26E-34 | 1,77E-32 |
| IGDCC4    | 15q22.31     | 0,551931519 | 6,66E-34 | 1,88E-32 |
| CD79A     | 19q13.2      | 0,551808128 | 6,93E-34 | 1,96E-32 |
| FXYP6     | 11q23.3      | 0,551715255 | 7,14E-34 | 2,01E-32 |

|           |                                 |             |          |          |
|-----------|---------------------------------|-------------|----------|----------|
| PIK3CD    | 1p36.22                         | 0,551633626 | 7,33E-34 | 2,06E-32 |
| MIAT      | 22q12.1                         | 0,551630445 | 7,34E-34 | 2,06E-32 |
| OSM       | 22q12.2                         | 0,551398553 | 7,91E-34 | 2,22E-32 |
| FCRL2     | 1q23.1                          | 0,551345379 | 8,05E-34 | 2,26E-32 |
| ANGPTL1   | 1q25.2                          | 0,551333181 | 8,08E-34 | 2,26E-32 |
| GGT5      | 22q11.23                        | 0,551208695 | 8,41E-34 | 2,35E-32 |
| ZNF804A   | 2q32.1                          | 0,55117518  | 8,50E-34 | 2,38E-32 |
| HPGDS     | 4q22.3                          | 0,550706762 | 9,89E-34 | 2,76E-32 |
| CCL4L1    | 17q12 alternate reference locus | 0,550250325 | 1,15E-33 | 3,19E-32 |
| GREM1     | 15q13.3                         | 0,549781023 | 1,33E-33 | 3,71E-32 |
| SV2B      | 15q26.1                         | 0,54970247  | 1,37E-33 | 3,80E-32 |
| ZNF80     | 3q13.31                         | 0,549359844 | 1,53E-33 | 4,23E-32 |
| TMC8      | 17q25.3                         | 0,549322566 | 1,54E-33 | 4,28E-32 |
| LZTS1     | 8p21.3                          | 0,549315676 | 1,55E-33 | 4,28E-32 |
| SLC15A3   | 11q12.2                         | 0,549213374 | 1,60E-33 | 4,42E-32 |
| PLSCR4    | 3q24                            | 0,549184044 | 1,61E-33 | 4,46E-32 |
| CD300E    | 17q25.1                         | 0,54917641  | 1,62E-33 | 4,46E-32 |
| FAM180A   | 7q33                            | 0,549085717 | 1,67E-33 | 4,59E-32 |
| STX11     | 6q24.2                          | 0,549028207 | 1,70E-33 | 4,67E-32 |
| IL3RA     | Xp22.3 and Yp13.3               | 0,548999053 | 1,71E-33 | 4,70E-32 |
| CXCL13    | 4q21.1                          | 0,548941093 | 1,75E-33 | 4,78E-32 |
| FCAR      | 19q13.42                        | 0,548847368 | 1,80E-33 | 4,92E-32 |
| SGCD      | 5q33.2-q33.3                    | 0,548569076 | 1,97E-33 | 5,38E-32 |
| UNC5C     | 4q22.3                          | 0,548080101 | 2,30E-33 | 6,28E-32 |
| CPXM2     | 10q26.13                        | 0,547986993 | 2,37E-33 | 6,46E-32 |
| TNFRSF13B | 17p11.2                         | 0,547480969 | 2,78E-33 | 7,58E-32 |
| MMD       | 17q22                           | 0,547299153 | 2,95E-33 | 8,02E-32 |
| PRKG1     | 10q11.23-q21.1                  | 0,54729651  | 2,95E-33 | 8,02E-32 |
| PRICKLE1  | 12q12                           | 0,547241553 | 3,01E-33 | 8,15E-32 |
| COL1A1    | 17q21.33                        | 0,547136778 | 3,11E-33 | 8,42E-32 |
| COL5A1    | 9q34.3                          | 0,546662374 | 3,62E-33 | 9,78E-32 |
| FMO1      | 1q24.3                          | 0,546537681 | 3,76E-33 | 1,02E-31 |
| MAP1A     | 15q15.3                         | 0,546402822 | 3,93E-33 | 1,06E-31 |
| CCL3      | 17q12                           | 0,546240471 | 4,13E-33 | 1,11E-31 |
| TMEM119   | 12q23.3                         | 0,546173483 | 4,22E-33 | 1,14E-31 |
| NAV3      | 12q21.2                         | 0,546127618 | 4,29E-33 | 1,15E-31 |
| DENND1C   | 19p13.3                         | 0,545915344 | 4,58E-33 | 1,23E-31 |
| CILP      | 15q22.31                        | 0,545636806 | 5,01E-33 | 1,34E-31 |
| CCL5      | 17q12                           | 0,545601549 | 5,06E-33 | 1,35E-31 |
| ALPK2     | 18q21.31-q21.32                 | 0,545576949 | 5,10E-33 | 1,36E-31 |
| ST3GAL6   | 3q12.1                          | 0,545573632 | 5,11E-33 | 1,36E-31 |
| RGS13     | 1q31.2                          | 0,545477901 | 5,27E-33 | 1,40E-31 |
| GNB4      | 3q26.33                         | 0,545431046 | 5,35E-33 | 1,42E-31 |
| LAMA2     | 6q22.33                         | 0,545382281 | 5,43E-33 | 1,44E-31 |
| CHI3L1    | 1q32.1                          | 0,545349353 | 5,49E-33 | 1,46E-31 |
| COL5A2    | 2q32.2                          | 0,54469285  | 6,75E-33 | 1,79E-31 |
| SPON1     | 11p15.2                         | 0,544683662 | 6,77E-33 | 1,79E-31 |
| TNIP3     | 4q27                            | 0,544609409 | 6,93E-33 | 1,83E-31 |
| LOX       | 5q23.1                          | 0,544279404 | 7,70E-33 | 2,03E-31 |
| C1QTNF1   | 17q25.3                         | 0,544263502 | 7,73E-33 | 2,04E-31 |
| JCHAIN    | 4q13.3                          | 0,544223747 | 7,83E-33 | 2,06E-31 |
| AQP9      | 15q21.3                         | 0,544064981 | 8,24E-33 | 2,17E-31 |
| P2RY12    | 3q25.1                          | 0,543887358 | 8,71E-33 | 2,29E-31 |
| MAPRE2    | 18q12.1-q12.2                   | 0,543869668 | 8,76E-33 | 2,30E-31 |

|          |            |             |          |          |
|----------|------------|-------------|----------|----------|
| TRIL     | 7p14.3     | 0,543818011 | 8,90E-33 | 2,33E-31 |
| CTHRC1   | 8q22.3     | 0,543816308 | 8,91E-33 | 2,33E-31 |
| NRXN2    | 11q13.1    | 0,543783268 | 9,00E-33 | 2,35E-31 |
| HLA-DRB5 | 6p21.32    | 0,543457281 | 9,97E-33 | 2,60E-31 |
| IL4I1    | 19q13.33   | 0,543415053 | 1,01E-32 | 2,63E-31 |
| KIF19    | 17q25.1    | 0,543395948 | 1,02E-32 | 2,65E-31 |
| TIE1     | 1p34.2     | 0,543201969 | 1,08E-32 | 2,81E-31 |
| DACT1    | 14q23.1    | 0,542848773 | 1,21E-32 | 3,13E-31 |
| SERPINF1 | 17p13.3    | 0,542598762 | 1,31E-32 | 3,39E-31 |
| COL6A1   | 21q22.3    | 0,542208461 | 1,48E-32 | 3,82E-31 |
| IL18RAP  | 2q12.1     | 0,542177313 | 1,49E-32 | 3,86E-31 |
| TPP1     | 11p15.4    | 0,542169943 | 1,49E-32 | 3,86E-31 |
| SLCO5A1  | 8q13.3     | 0,542034799 | 1,56E-32 | 4,02E-31 |
| GAS1     | 9q21.33    | 0,541971701 | 1,59E-32 | 4,10E-31 |
| JAM3     | 11q25      | 0,54193389  | 1,61E-32 | 4,14E-31 |
| SLFN11   | 17q12      | 0,541812683 | 1,67E-32 | 4,29E-31 |
| SLC43A3  | 11q12.1    | 0,541491291 | 1,85E-32 | 4,74E-31 |
| GLI2     | 2q14.2     | 0,541368365 | 1,92E-32 | 4,92E-31 |
| CREM     | 10p11.21   | 0,541229971 | 2,01E-32 | 5,13E-31 |
| RASGRP3  | 2p22.3     | 0,541160822 | 2,05E-32 | 5,24E-31 |
| SIRPG    | 20p13      | 0,540709341 | 2,36E-32 | 6,02E-31 |
| GZMA     | 5q11.2     | 0,54066255  | 2,40E-32 | 6,11E-31 |
| FIBIN    | 11p14.2    | 0,540483148 | 2,53E-32 | 6,45E-31 |
| CHST13   | 3q21.3     | 0,540404605 | 2,60E-32 | 6,60E-31 |
| CRHBP    | 5q13.3     | 0,540240076 | 2,73E-32 | 6,94E-31 |
| KLHL4    | Xq21.31    | 0,540020346 | 2,93E-32 | 7,42E-31 |
| SFRP4    | 7p14.1     | 0,539839924 | 3,09E-32 | 7,84E-31 |
| GPR18    | 13q32.3    | 0,539696456 | 3,24E-32 | 8,19E-31 |
| PLXDC1   | 17q12      | 0,539613113 | 3,32E-32 | 8,39E-31 |
| SGIP1    | 1p31.3     | 0,539474238 | 3,47E-32 | 8,75E-31 |
| PTPRD    | 9p24.1-p23 | 0,539023341 | 3,99E-32 | 1,01E-30 |
| EPHA3    | 3p11.1     | 0,539019446 | 3,99E-32 | 1,01E-30 |
| BHLHE22  | 8q12.3     | 0,538906752 | 4,14E-32 | 1,04E-30 |
| GPR84    | 12q13.13   | 0,538890489 | 4,16E-32 | 1,04E-30 |
| SPIB     | 19q13.33   | 0,538788546 | 4,29E-32 | 1,08E-30 |
| CALCRL   | 2q32.1     | 0,53872491  | 4,38E-32 | 1,10E-30 |
| TREML2   | 6p21.1     | 0,538674519 | 4,44E-32 | 1,11E-30 |
| TRAM2    | 6p12.2     | 0,538543276 | 4,63E-32 | 1,16E-30 |
| MZB1     | 5q31.2     | 0,538515142 | 4,67E-32 | 1,17E-30 |
| PNOC     | 8p21.1     | 0,538464898 | 4,74E-32 | 1,18E-30 |
| THY1     | 11q23.3    | 0,538411292 | 4,82E-32 | 1,20E-30 |
| GLT1D1   | 12q24.33   | 0,538242516 | 5,08E-32 | 1,26E-30 |
| PRR16    | 5q23.1     | 0,538236019 | 5,09E-32 | 1,26E-30 |
| ARID5A   | 2q11.2     | 0,538231955 | 5,10E-32 | 1,26E-30 |
| SSC5D    | 19q13.42   | 0,538222702 | 5,11E-32 | 1,27E-30 |
| GBGT1    | 9q34.2     | 0,538124706 | 5,27E-32 | 1,30E-30 |
| GRIP2    | 3p25.1     | 0,538076455 | 5,35E-32 | 1,32E-30 |
| RENBP    | Xq28       | 0,538059444 | 5,38E-32 | 1,33E-30 |
| CLEC9A   | 12p13.2    | 0,537822948 | 5,78E-32 | 1,43E-30 |
| GASK1B   | 4q32.1     | 0,537633871 | 6,13E-32 | 1,51E-30 |
| DAAM2    | 6p21.2     | 0,537576978 | 6,24E-32 | 1,53E-30 |
| JAK3     | 19p13.11   | 0,537407536 | 6,58E-32 | 1,61E-30 |
| GAL3ST4  | 7q22.1     | 0,537115473 | 7,20E-32 | 1,76E-30 |
| DPT      | 1q24.2     | 0,53692624  | 7,63E-32 | 1,87E-30 |
| PODN     | 1p32.3     | 0,536925358 | 7,63E-32 | 1,87E-30 |

|            |               |             |          |          |
|------------|---------------|-------------|----------|----------|
| MS4A1      | 11q12.2       | 0,536862956 | 7,78E-32 | 1,90E-30 |
| SFRP2      | 4q31.3        | 0,536856034 | 7,80E-32 | 1,90E-30 |
| CSMD2      | 1p35.1        | 0,536525364 | 8,63E-32 | 2,10E-30 |
| NCR3       | 6p21.33       | 0,536431008 | 8,89E-32 | 2,16E-30 |
| FN1        | 2q35          | 0,536252536 | 9,39E-32 | 2,28E-30 |
| CXCR2P1    | 2q35          | 0,536180202 | 9,60E-32 | 2,33E-30 |
| MILR1      | 17q23.3       | 0,53582212  | 1,07E-31 | 2,60E-30 |
| STAT4      | 2q32.2-q32.3  | 0,535610923 | 1,14E-31 | 2,77E-30 |
| GPX8       | 5q11.2        | 0,535457093 | 1,20E-31 | 2,90E-30 |
| ST8SIA1    | 12p12.1       | 0,535369039 | 1,23E-31 | 2,98E-30 |
| BMS1P20    | 22q11.22      | 0,535007956 | 1,38E-31 | 3,32E-30 |
| NEGR1      | 1p31.1        | 0,535003716 | 1,38E-31 | 3,32E-30 |
| STX2       | 12q24.33      | 0,534994705 | 1,38E-31 | 3,32E-30 |
| SVEP1      | 9q31.3        | 0,534874205 | 1,43E-31 | 3,45E-30 |
| ZCCHC24    | 10q22.3       | 0,534850705 | 1,44E-31 | 3,47E-30 |
| PIK3CD-AS1 | 1p36.22       | 0,534503388 | 1,60E-31 | 3,85E-30 |
| AKAP5      | 14q23.3       | 0,53445928  | 1,63E-31 | 3,90E-30 |
| CCL13      | 17q12         | 0,534332803 | 1,69E-31 | 4,05E-30 |
| ISLR       | 15q24.1       | 0,534304391 | 1,71E-31 | 4,08E-30 |
| CSGALNACT1 | 8p21.3        | 0,533801011 | 1,99E-31 | 4,75E-30 |
| CPEB1      | 15q25.2       | 0,533690217 | 2,06E-31 | 4,91E-30 |
| SMAP2      | 1p34.2        | 0,533089317 | 2,47E-31 | 5,88E-30 |
| CCND2      | 12p13.32      | 0,533076773 | 2,48E-31 | 5,90E-30 |
| ZNF366     | 5q13.1        | 0,533005834 | 2,53E-31 | 6,02E-30 |
| IRAG1      | 11p15.4       | 0,532814217 | 2,69E-31 | 6,37E-30 |
| IL27       | 16p12.1-p11.2 | 0,532719884 | 2,76E-31 | 6,55E-30 |
| ASGR2      | 17p13.1       | 0,53270394  | 2,78E-31 | 6,58E-30 |
| IGFLR1     | 19q13.12      | 0,532631346 | 2,84E-31 | 6,71E-30 |
| ADGRD1     | 12q24.33      | 0,532283482 | 3,15E-31 | 7,45E-30 |
| SPATC1     | 8q24.3        | 0,532268429 | 3,17E-31 | 7,48E-30 |
| CIITA      | 16p13.13      | 0,532060407 | 3,38E-31 | 7,96E-30 |
| ST3GAL2    | 16q22.1       | 0,53195234  | 3,49E-31 | 8,21E-30 |
| ETV1       | 7p21.2        | 0,531820355 | 3,63E-31 | 8,54E-30 |
| GRAP       | 17p11.2       | 0,531737312 | 3,72E-31 | 8,74E-30 |
| HLA-DOB    | 6p21.32       | 0,531645106 | 3,83E-31 | 8,98E-30 |
| CALU       | 7q32.1        | 0,53150921  | 3,99E-31 | 9,35E-30 |
| PTCRA      | 6p21.1        | 0,531329486 | 4,21E-31 | 9,86E-30 |
| SERPINA1   | 14q32.13      | 0,531260789 | 4,30E-31 | 1,01E-29 |
| PDGFC      | 4q32.1        | 0,530996466 | 4,66E-31 | 1,09E-29 |
| PCSK5      | 9q21.13       | 0,530647674 | 5,17E-31 | 1,21E-29 |
| LAG3       | 12p13.31      | 0,530632492 | 5,20E-31 | 1,21E-29 |
| PRKCB      | 16p12.2-p12.1 | 0,530623858 | 5,21E-31 | 1,21E-29 |
| ADAM6      | 14q32.33      | 0,530605812 | 5,24E-31 | 1,22E-29 |
| SGTB       | 5q12.3        | 0,530425062 | 5,53E-31 | 1,28E-29 |
| TMEM140    | 7q33          | 0,530391315 | 5,59E-31 | 1,30E-29 |
| HVCN1      | 12q24.11      | 0,530340959 | 5,68E-31 | 1,31E-29 |
| IFITM2     | 11p15.5       | 0,530264742 | 5,81E-31 | 1,34E-29 |
| TCN2       | 22q12.2       | 0,529914261 | 6,45E-31 | 1,49E-29 |
| APLNR      | 11q12.1       | 0,529693933 | 6,90E-31 | 1,59E-29 |
| SOD2       | 6q25.3        | 0,529516893 | 7,27E-31 | 1,68E-29 |
| LRIG1      | 3p14.1        | 0,529467598 | 7,38E-31 | 1,70E-29 |
| GPR55      | 2q37.1        | 0,529270211 | 7,83E-31 | 1,80E-29 |
| APOC2      | 19q13.32      | 0,528857821 | 8,87E-31 | 2,04E-29 |
| PCDH18     | 4q28.3        | 0,528668621 | 9,38E-31 | 2,15E-29 |
| CAVIN1     | 17q21.2       | 0,528508897 | 9,84E-31 | 2,26E-29 |

|          |               |             |          |          |
|----------|---------------|-------------|----------|----------|
| CD248    | 11q13.2       | 0,528122483 | 1,11E-30 | 2,53E-29 |
| THBS1    | 15q14         | 0,527592954 | 1,29E-30 | 2,96E-29 |
| CHN1     | 2q31.1        | 0,527431639 | 1,36E-30 | 3,10E-29 |
| RNF130   | 5q35.3        | 0,526995223 | 1,55E-30 | 3,53E-29 |
| MAP3K3   | 17q23.3       | 0,526483186 | 1,80E-30 | 4,11E-29 |
| PCDHGB7  | 5q31.3        | 0,526432026 | 1,83E-30 | 4,17E-29 |
| TSPAN11  | 12p11.21      | 0,526184586 | 1,97E-30 | 4,48E-29 |
| NAP1L3   | Xq21.32       | 0,526172552 | 1,98E-30 | 4,49E-29 |
| MFGE8    | 15q26.1       | 0,526146952 | 1,99E-30 | 4,52E-29 |
| MAP1LC3C | 1q43          | 0,526029398 | 2,06E-30 | 4,67E-29 |
| RAB27A   | 15q21.3       | 0,525949769 | 2,11E-30 | 4,78E-29 |
| SYNE1    | 6q25.2        | 0,525581025 | 2,36E-30 | 5,33E-29 |
| CYP1B1   | 2p22.2        | 0,525526805 | 2,39E-30 | 5,41E-29 |
| LCN10    | 9q34.3        | 0,525298315 | 2,56E-30 | 5,78E-29 |
| RGS4     | 1q23.3        | 0,525259279 | 2,59E-30 | 5,84E-29 |
| NRP1     | 10p11.22      | 0,524960855 | 2,83E-30 | 6,37E-29 |
| ARHGAP18 | 6q22.33       | 0,524555006 | 3,19E-30 | 7,18E-29 |
| CCPG1    | 15q21.3       | 0,524284676 | 3,46E-30 | 7,77E-29 |
| ACP5     | 19p13.2       | 0,524220539 | 3,53E-30 | 7,91E-29 |
| PTGER3   | 1p31.1        | 0,524094474 | 3,66E-30 | 8,20E-29 |
| PTPRCAP  | 11q13.2       | 0,523989433 | 3,77E-30 | 8,45E-29 |
| COL16A1  | 1p35.2        | 0,523959219 | 3,81E-30 | 8,51E-29 |
| OMD      | 9q22.31       | 0,523937582 | 3,83E-30 | 8,56E-29 |
| CD69     | 12p13.31      | 0,523874168 | 3,90E-30 | 8,71E-29 |
| MYADM    | 19q13.42      | 0,523787303 | 4,01E-30 | 8,93E-29 |
| CLIC5    | 6p21.1        | 0,523516973 | 4,34E-30 | 9,66E-29 |
| COL4A2   | 13q34         | 0,523439938 | 4,44E-30 | 9,87E-29 |
| ZMYND15  | 17p13.2       | 0,522924543 | 5,17E-30 | 1,15E-28 |
| SLC16A2  | Xq13.2        | 0,52271994  | 5,49E-30 | 1,22E-28 |
| CHRD12   | 11q13.4       | 0,522649699 | 5,60E-30 | 1,24E-28 |
| TPSAB1   | 16p13.3       | 0,522617992 | 5,65E-30 | 1,25E-28 |
| LYVE1    | 11p15.4       | 0,522591312 | 5,70E-30 | 1,26E-28 |
| ZBP1     | 20q13.31      | 0,522511574 | 5,83E-30 | 1,29E-28 |
| TPSB2    | 16p13.3       | 0,522382646 | 6,06E-30 | 1,34E-28 |
| PLCL2    | 3p24.3        | 0,522349429 | 6,12E-30 | 1,35E-28 |
| MRC2     | 17q23.2       | 0,522287412 | 6,23E-30 | 1,37E-28 |
| ANGPTL2  | 9q33.3        | 0,522120973 | 6,54E-30 | 1,44E-28 |
| PLXNA4   | 7q32.3        | 0,521955381 | 6,87E-30 | 1,51E-28 |
| FASLG    | 1q24.3        | 0,521869284 | 7,04E-30 | 1,54E-28 |
| MN1      | 22q12.1       | 0,521708057 | 7,38E-30 | 1,62E-28 |
| PIM2     | Xp11.23       | 0,521435959 | 7,99E-30 | 1,75E-28 |
| IL6      | 7p15.3        | 0,521269598 | 8,39E-30 | 1,84E-28 |
| RBMS3    | 3p24.1        | 0,521239534 | 8,47E-30 | 1,85E-28 |
| GRAMD1B  | 11q24.1       | 0,521130013 | 8,74E-30 | 1,91E-28 |
| RAPGEF1  | 9q34.13       | 0,52105679  | 8,93E-30 | 1,95E-28 |
| PLN      | 6q22.31       | 0,520899414 | 9,35E-30 | 2,04E-28 |
| RBM24    | 6p22.3        | 0,520754066 | 9,76E-30 | 2,12E-28 |
| PTPRO    | 12p12.3       | 0,520669163 | 1,00E-29 | 2,17E-28 |
| CLIP3    | 19q13.12      | 0,520319477 | 1,11E-29 | 2,40E-28 |
| TLR6     | 4p14          | 0,520118876 | 1,17E-29 | 2,55E-28 |
| GZMH     | 14q12         | 0,52004587  | 1,20E-29 | 2,60E-28 |
| ARL4C    | 2q37.1        | 0,520022998 | 1,21E-29 | 2,61E-28 |
| ARHGAP24 | 4q21.23-q21.3 | 0,519968159 | 1,23E-29 | 2,65E-28 |
| PLPP7    | 9q34.13       | 0,51993311  | 1,24E-29 | 2,68E-28 |
| ARRB2    | 17p13.2       | 0,519307417 | 1,49E-29 | 3,21E-28 |

|          |          |             |          |          |
|----------|----------|-------------|----------|----------|
| PLEKHO1  | 1q21.2   | 0,519041151 | 1,61E-29 | 3,46E-28 |
| LRRC15   | 3q29     | 0,518926223 | 1,66E-29 | 3,57E-28 |
| DPEP1    | 16q24.3  | 0,518924495 | 1,66E-29 | 3,57E-28 |
| NR4A3    | 9q22     | 0,518771527 | 1,74E-29 | 3,73E-28 |
| HAPLN3   | 15q26.1  | 0,51877082  | 1,74E-29 | 3,73E-28 |
| CFL2     | 14q13.1  | 0,518751915 | 1,75E-29 | 3,74E-28 |
| RORA     | 15q22.2  | 0,518695198 | 1,78E-29 | 3,80E-28 |
| KLHL5    | 4p14     | 0,518179097 | 2,06E-29 | 4,41E-28 |
| STK17B   | 2q32.3   | 0,518105242 | 2,11E-29 | 4,50E-28 |
| LAYN     | 11q23.1  | 0,517891563 | 2,24E-29 | 4,78E-28 |
| FCRL1    | 1q23.1   | 0,517870958 | 2,26E-29 | 4,81E-28 |
| TRAF1    | 9q33.2   | 0,517862475 | 2,26E-29 | 4,81E-28 |
| VAV1     | 19p13.3  | 0,517860885 | 2,26E-29 | 4,81E-28 |
| LRFN5    | 14q21.1  | 0,517817488 | 2,29E-29 | 4,87E-28 |
| CCIN     | 9p13.3   | 0,517753555 | 2,33E-29 | 4,95E-28 |
| FBLN2    | 3p25.1   | 0,517750102 | 2,34E-29 | 4,95E-28 |
| SNAI1    | 20q13.13 | 0,517658932 | 2,40E-29 | 5,08E-28 |
| FAT4     | 4q28.1   | 0,517403267 | 2,58E-29 | 5,46E-28 |
| SLAMF7   | 1q23.3   | 0,517256264 | 2,69E-29 | 5,69E-28 |
| BCL6B    | 17p13.1  | 0,517192656 | 2,74E-29 | 5,79E-28 |
| SNAP25   | 20p12.2  | 0,51706215  | 2,85E-29 | 6,01E-28 |
| PALLD    | 4q32.3   | 0,516930277 | 2,96E-29 | 6,23E-28 |
| GPR68    | 14q32.11 | 0,516554288 | 3,30E-29 | 6,94E-28 |
| SUSD3    | 9q22.31  | 0,516400394 | 3,45E-29 | 7,25E-28 |
| C2       | 6p21.33  | 0,516360816 | 3,49E-29 | 7,32E-28 |
| MATK     | 19p13.3  | 0,516355804 | 3,49E-29 | 7,32E-28 |
| TNFRSF17 | 16p13.13 | 0,516068365 | 3,79E-29 | 7,95E-28 |
| TOX2     | 20q13.12 | 0,515780401 | 4,12E-29 | 8,62E-28 |
| MEFV     | 16p13.3  | 0,51521089  | 4,85E-29 | 1,01E-27 |
| TNFSF14  | 19p13.3  | 0,514922197 | 5,27E-29 | 1,10E-27 |
| GATA6    | 18q11.2  | 0,514705087 | 5,61E-29 | 1,17E-27 |
| APBB2    | 4p14-p13 | 0,514605083 | 5,77E-29 | 1,20E-27 |
| ENPP2    | 8q24.12  | 0,514247646 | 6,39E-29 | 1,33E-27 |
| IL18R1   | 2q12.1   | 0,514178561 | 6,52E-29 | 1,36E-27 |
| GALNT17  | 7q11.22  | 0,514106014 | 6,65E-29 | 1,38E-27 |
| BGN      | Xq28     | 0,514034209 | 6,79E-29 | 1,41E-27 |
| FFAR3    | 19q13.12 | 0,514003476 | 6,85E-29 | 1,42E-27 |
| TGFB2    | 3p24.1   | 0,51390187  | 7,05E-29 | 1,46E-27 |
| ADGRL4   | 1p31.1   | 0,513769886 | 7,32E-29 | 1,52E-27 |
| CD70     | 19p13.3  | 0,513747659 | 7,37E-29 | 1,52E-27 |
| RGL4     | 22q11.23 | 0,513169744 | 8,69E-29 | 1,79E-27 |
| CD163L1  | 12p13.31 | 0,513112082 | 8,83E-29 | 1,82E-27 |
| MS4A14   | 11q12.2  | 0,513064399 | 8,96E-29 | 1,85E-27 |
| CCL11    | 17q12    | 0,512926253 | 9,31E-29 | 1,92E-27 |
| PDE3A    | 12p12.2  | 0,512690313 | 9,96E-29 | 2,05E-27 |
| LATS2    | 13q12.11 | 0,512594214 | 1,02E-28 | 2,10E-27 |
| TRPS1    | 8q23.3   | 0,512465409 | 1,06E-28 | 2,18E-27 |
| PPFIA2   | 12q21.31 | 0,512353857 | 1,10E-28 | 2,25E-27 |
| GALNT15  | 3p25.1   | 0,512174407 | 1,15E-28 | 2,36E-27 |
| KIF17    | 1p36.12  | 0,51205956  | 1,19E-28 | 2,44E-27 |
| NCF4     | 22q12.3  | 0,511863615 | 1,26E-28 | 2,57E-27 |
| FKBP5    | 6p21.31  | 0,511774742 | 1,29E-28 | 2,64E-27 |
| LPAR4    | Xq21.1   | 0,511748017 | 1,30E-28 | 2,65E-27 |
| GAS6     | 13q34    | 0,511739758 | 1,30E-28 | 2,66E-27 |
| FLNC     | 7q32.1   | 0,511592225 | 1,36E-28 | 2,77E-27 |

|            |              |             |          |          |
|------------|--------------|-------------|----------|----------|
| ADAMTS3    | 4q13.3       | 0,511492999 | 1,40E-28 | 2,85E-27 |
| HTR2A      | 13q14.2      | 0,511455114 | 1,41E-28 | 2,87E-27 |
| CACNA2D4   | 12p13.33     | 0,511334992 | 1,46E-28 | 2,97E-27 |
| POMC       | 2p23.3       | 0,511313197 | 1,47E-28 | 2,98E-27 |
| EFEMP1     | 2p16.1       | 0,511179485 | 1,53E-28 | 3,10E-27 |
| REM1       | 20q11.21     | 0,511081602 | 1,57E-28 | 3,18E-27 |
| CAMK1G     | 1q32.2       | 0,510780794 | 1,71E-28 | 3,46E-27 |
| SYNM       | 15q26.3      | 0,510767982 | 1,72E-28 | 3,47E-27 |
| CD19       | 16p11.2      | 0,510632476 | 1,78E-28 | 3,60E-27 |
| OTOA       | 16p12.2      | 0,510603173 | 1,80E-28 | 3,63E-27 |
| PDPN       | 1p36.21      | 0,510589529 | 1,81E-28 | 3,64E-27 |
| ANTXR1     | 2p13.3       | 0,510363547 | 1,93E-28 | 3,87E-27 |
| ADRA2A     | 10q25.2      | 0,510223258 | 2,00E-28 | 4,02E-27 |
| GZMB       | 14q12        | 0,510173345 | 2,03E-28 | 4,08E-27 |
| TLDC2      | 20q11.23     | 0,510103665 | 2,07E-28 | 4,15E-27 |
| NCAM1      | 11q23.2      | 0,510057217 | 2,10E-28 | 4,20E-27 |
| CYTL1      | 4p16.2       | 0,510036067 | 2,11E-28 | 4,23E-27 |
| SCN7A      | 2q24.3       | 0,509792832 | 2,26E-28 | 4,52E-27 |
| ISLR2      | 15q24.1      | 0,509792532 | 2,26E-28 | 4,52E-27 |
| ARHGAP30   | 1q23.3       | 0,509678356 | 2,34E-28 | 4,66E-27 |
| CTSB       | 8p23.1       | 0,509445484 | 2,49E-28 | 4,97E-27 |
| VMO1       | 17p13.2      | 0,509369973 | 2,55E-28 | 5,07E-27 |
| STOM       | 9q33.2       | 0,509354313 | 2,56E-28 | 5,09E-27 |
| TARP       | 7p14.1       | 0,509238152 | 2,64E-28 | 5,25E-27 |
| PNMA2      | 8p21.2       | 0,508986298 | 2,84E-28 | 5,63E-27 |
| CSDC2      | 22q13.2      | 0,508938087 | 2,88E-28 | 5,70E-27 |
| CTSL       | 9q21.33      | 0,508828848 | 2,97E-28 | 5,87E-27 |
| TRPC3      | 4q27         | 0,508752696 | 3,03E-28 | 6,00E-27 |
| CFI        | 4q25         | 0,508679724 | 3,09E-28 | 6,11E-27 |
| PROS1      | 3q11.1       | 0,508557634 | 3,20E-28 | 6,32E-27 |
| HS3ST3A1   | 17p12        | 0,508523436 | 3,23E-28 | 6,37E-27 |
| TPM1       | 15q22.2      | 0,50852     | 3,23E-28 | 6,37E-27 |
| EPSTI1     | 13q14.11     | 0,508405684 | 3,34E-28 | 6,58E-27 |
| MCHR1      | 22q13.2      | 0,50827125  | 3,47E-28 | 6,82E-27 |
| SUCNR1     | 3q25.1       | 0,508250767 | 3,49E-28 | 6,85E-27 |
| SMOC2      | 6q27         | 0,508018917 | 3,72E-28 | 7,31E-27 |
| ANKRD36BP2 | 2p11.2       | 0,507910297 | 3,84E-28 | 7,52E-27 |
| NIBAN1     | 1q25.3       | 0,507742932 | 4,02E-28 | 7,88E-27 |
| KIRREL1    | 1q23.1       | 0,507709208 | 4,06E-28 | 7,94E-27 |
| APCDD1L    | 20q13.32     | 0,507576647 | 4,21E-28 | 8,24E-27 |
| DMD        | Xp21.2-p21.1 | 0,507482342 | 4,32E-28 | 8,45E-27 |
| SPON2      | 4p16.3       | 0,507199268 | 4,68E-28 | 9,13E-27 |
| ABCB4      | 7q21.12      | 0,50718637  | 4,70E-28 | 9,16E-27 |
| LAMP5      | 20p12.2      | 0,50713463  | 4,76E-28 | 9,28E-27 |
| SPTA1      | 1q23.1       | 0,507123476 | 4,78E-28 | 9,30E-27 |
| COL18A1    | 21q22.3      | 0,507026115 | 4,91E-28 | 9,55E-27 |
| CCL21      | 9p13.3       | 0,506590434 | 5,54E-28 | 1,08E-26 |
| TLL1       | 4q32.3       | 0,506439968 | 5,78E-28 | 1,12E-26 |
| PSTPIP1    | 15q24.3      | 0,506416017 | 5,82E-28 | 1,13E-26 |
| NLRP12     | 19q13.42     | 0,505940334 | 6,64E-28 | 1,29E-26 |
| PRND       | 20p13        | 0,50589671  | 6,73E-28 | 1,30E-26 |
| RAB31      | 18p11.22     | 0,505755209 | 7,00E-28 | 1,35E-26 |
| MGP        | 12p12.3      | 0,505609266 | 7,28E-28 | 1,41E-26 |
| ITGA5      | 12q13.13     | 0,505347064 | 7,83E-28 | 1,51E-26 |
| FAM30A     | 14q32.33     | 0,505293109 | 7,95E-28 | 1,53E-26 |

|           |                 |              |          |          |
|-----------|-----------------|--------------|----------|----------|
| EGR3      | 8p21.3          | 0,505230274  | 8,09E-28 | 1,56E-26 |
| CD302     | 2q24.2          | 0,505221616  | 8,11E-28 | 1,56E-26 |
| PCDH12    | 5q31.3          | 0,505172851  | 8,22E-28 | 1,58E-26 |
| ADAMTS9   | 3p14.1          | 0,505033026  | 8,55E-28 | 1,64E-26 |
| TMEM100   | 17q22           | 0,504744114  | 9,26E-28 | 1,78E-26 |
| ADAMTS16  | 5p15.32         | 0,504419188  | 1,01E-27 | 1,94E-26 |
| KCNT2     | 1q31.3          | 0,504360957  | 1,03E-27 | 1,97E-26 |
| TWIST2    | 2q37.3          | 0,504332884  | 1,04E-27 | 1,98E-26 |
| DNAJB5    | 9p13.3          | 0,50412351   | 1,10E-27 | 2,10E-26 |
| CSF3R     | 1p34.3          | 0,504049478  | 1,12E-27 | 2,14E-26 |
| KCNJ5     | 11q24.3         | 0,503959083  | 1,15E-27 | 2,19E-26 |
| DNM1P46   | 15q26.3         | 0,50373418   | 1,22E-27 | 2,33E-26 |
| RAB42     | 1p35.3          | 0,503711653  | 1,23E-27 | 2,34E-26 |
| TMEM130   | 7q22.1          | 0,503417186  | 1,34E-27 | 2,54E-26 |
| LINC00092 | 9q22.32         | 0,503233889  | 1,41E-27 | 2,67E-26 |
| MSN       | Xq12            | 0,502786876  | 1,59E-27 | 3,01E-26 |
| MEOX1     | 17q21.31        | 0,502778198  | 1,59E-27 | 3,02E-26 |
| CACNA2D1  | 7q21.11         | 0,502730372  | 1,61E-27 | 3,06E-26 |
| CLEC5A    | 7q34            | 0,502717107  | 1,62E-27 | 3,06E-26 |
| COL4A1    | 13q34           | 0,502644467  | 1,65E-27 | 3,12E-26 |
| TENM3     | 4q34.3-q35.1    | 0,502440467  | 1,75E-27 | 3,30E-26 |
| DENND5B   | 12p11.21        | 0,502363712  | 1,79E-27 | 3,37E-26 |
| RAB37     | 17q25.1         | 0,502232125  | 1,85E-27 | 3,49E-26 |
| TSHZ3     | 19q12           | 0,501823581  | 2,07E-27 | 3,90E-26 |
| SRPX      | Xp11.4          | 0,50181139   | 2,08E-27 | 3,91E-26 |
| BVES      | 6q21            | 0,501801849  | 2,08E-27 | 3,91E-26 |
| FHL1      | Xq26.3          | 0,501555195  | 2,23E-27 | 4,18E-26 |
| CHST1     | 11p11.2         | 0,501548679  | 2,23E-27 | 4,19E-26 |
| IL32      | 16p13.3         | 0,501431867  | 2,31E-27 | 4,32E-26 |
| PGM2L1    | 11q13.4         | 0,501029552  | 2,57E-27 | 4,82E-26 |
| MMP9      | 20q13.12        | 0,500983967  | 2,61E-27 | 4,87E-26 |
| RCAN1     | 21q22.12        | 0,500638898  | 2,86E-27 | 5,35E-26 |
| EMILIN2   | 18p11.32-p11.31 | 0,500204603  | 3,22E-27 | 6,02E-26 |
| DPYSL3    | 5q32            | 0,500184461  | 3,24E-27 | 6,05E-26 |
| NTM       | 11q25           | 0,50000053   | 3,41E-27 | 6,35E-26 |
| SYTL1     | 1p36.11         | -0,504433064 | 1,01E-27 | 1,93E-26 |

**Figure S1**

**Immunohistochemical staining of IQGAP2 in NMIBC and metachronous MIBC**  
tabular form, continued on the next pages

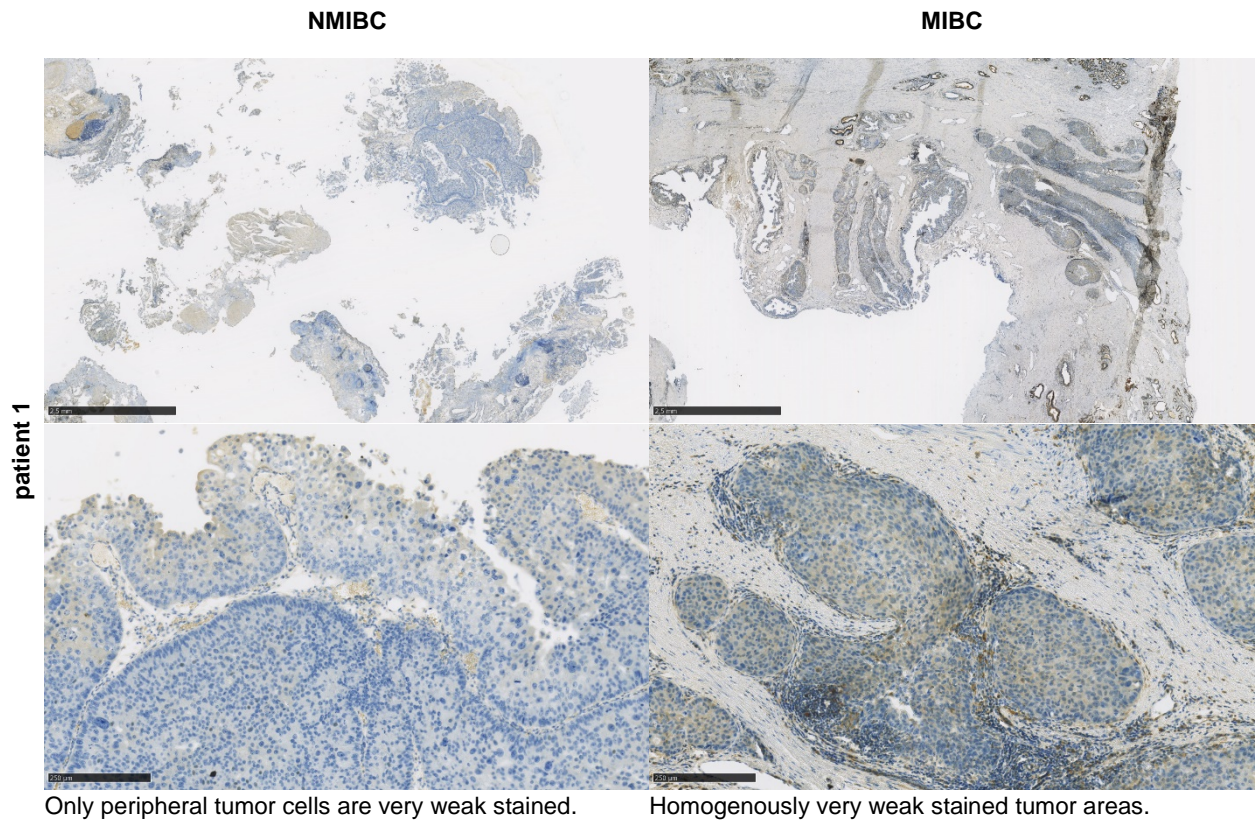

**NMIBC**

**MIBC**

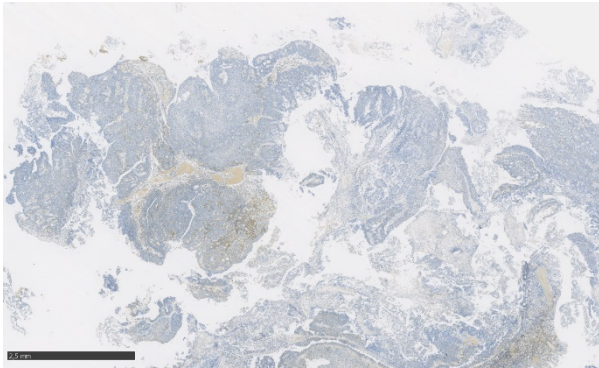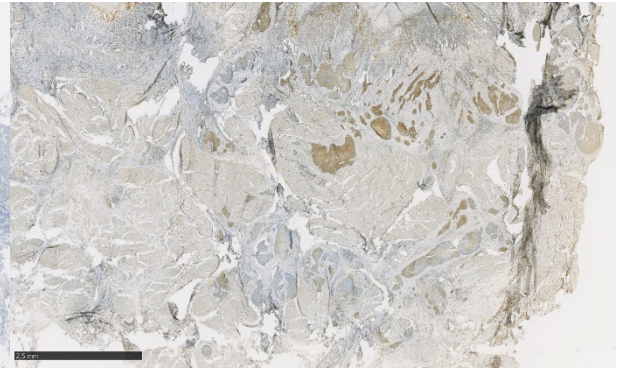

patient 2

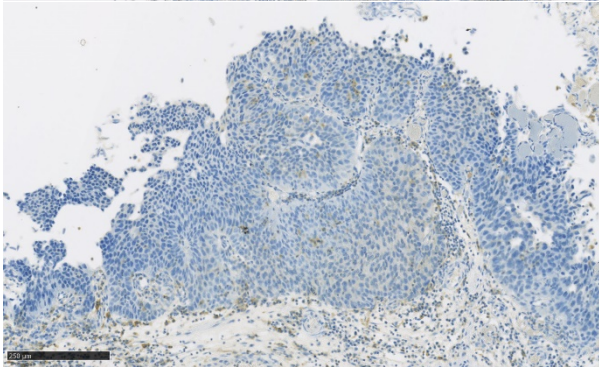

Negative, few single tumor cells are weak positive.

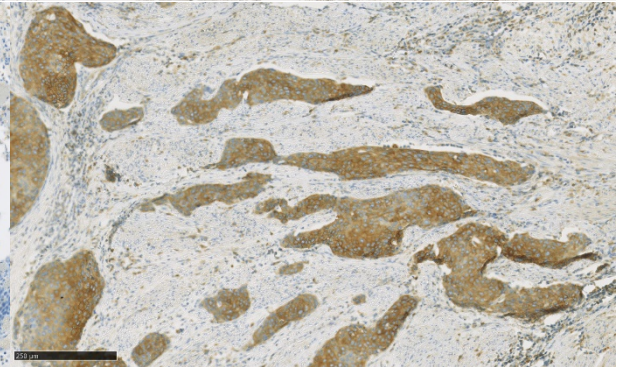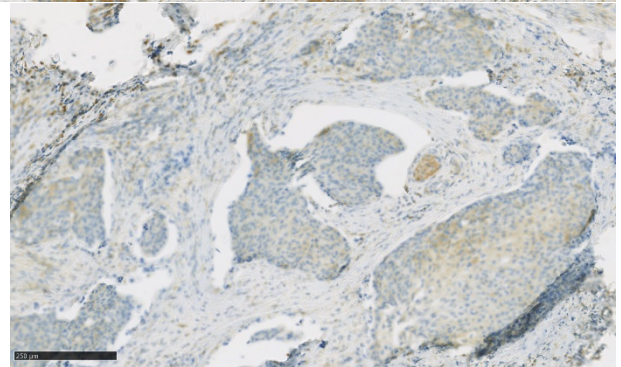

Negative, weak and strong stained tumor areas in equal ratios.

**NMIBC**

**MIBC**

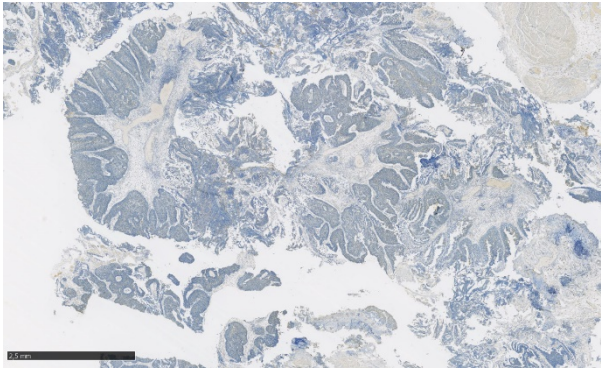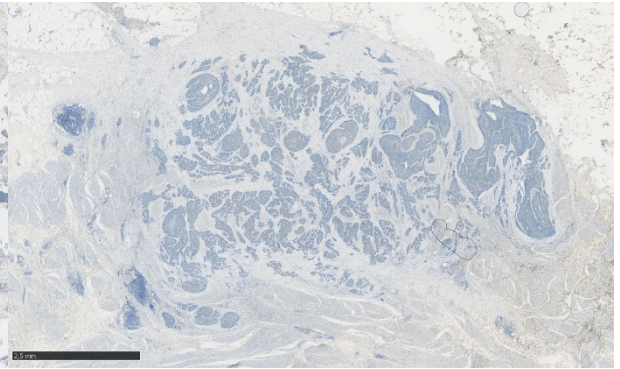

patient 4

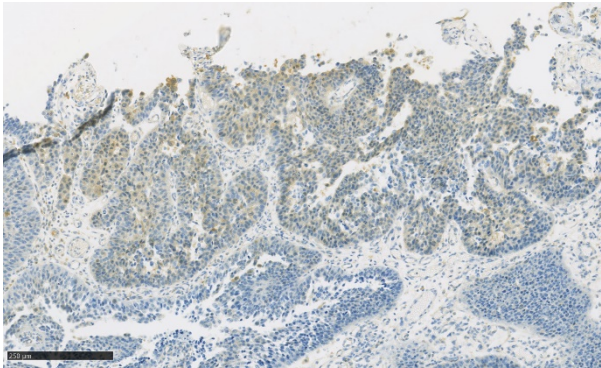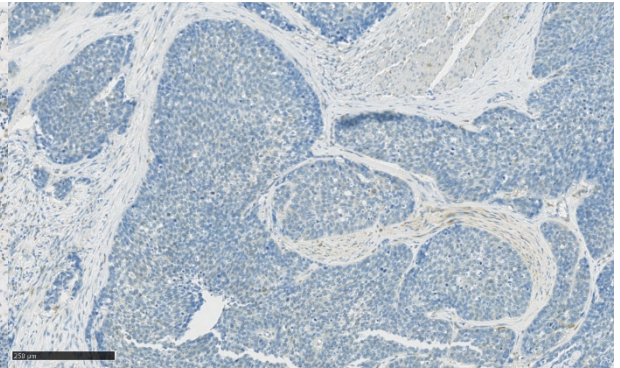

No staining or very weak staining of tumor cells.

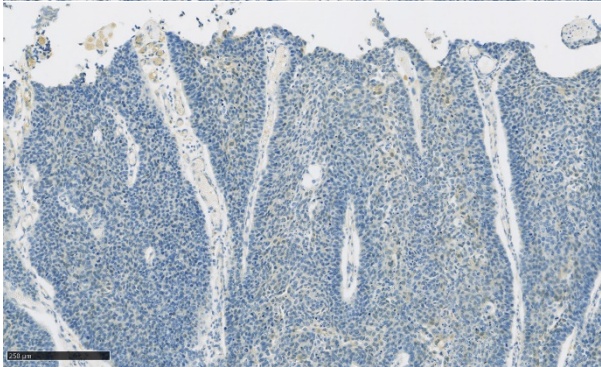

Some tumor areas are weak stained.

**NMIBC**

**MIBC**

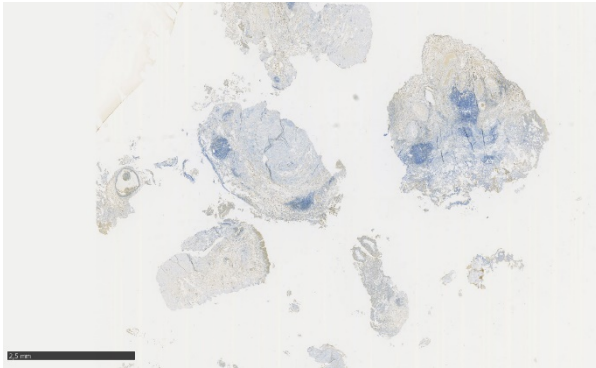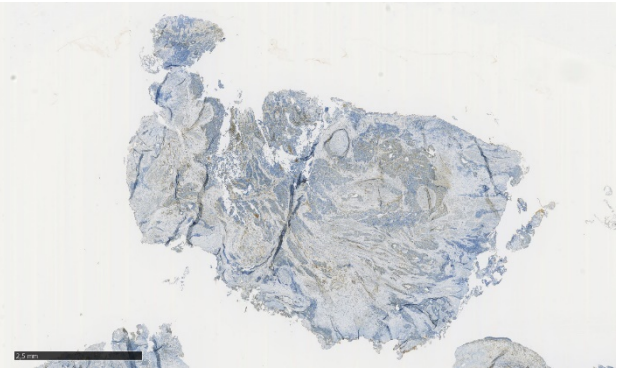

**patient 5**

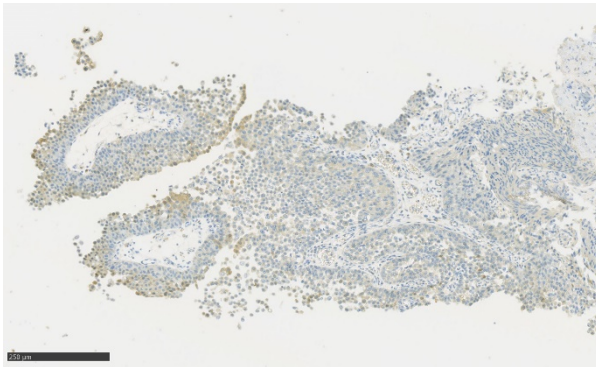

Weak to moderate staining.

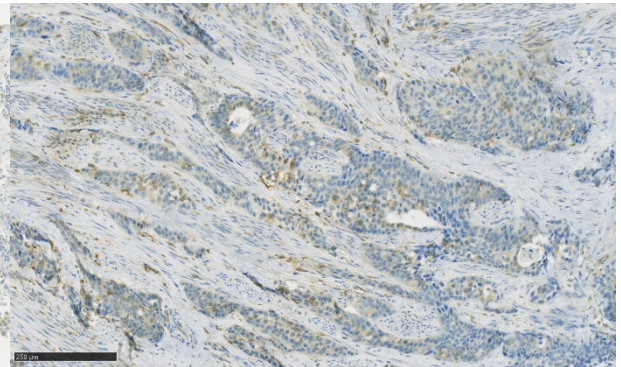

Mainly negative to weak staining. Few strong stained single tumor cells.

**NMIBC**

**MIBC**

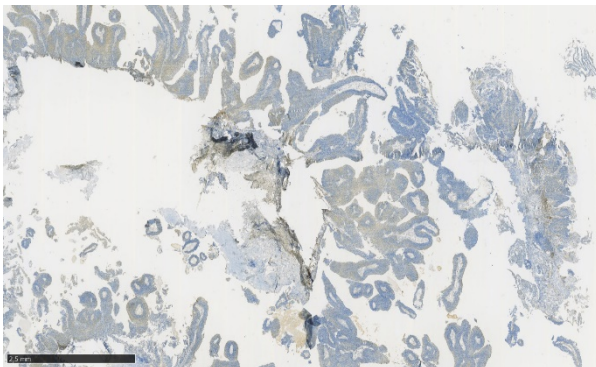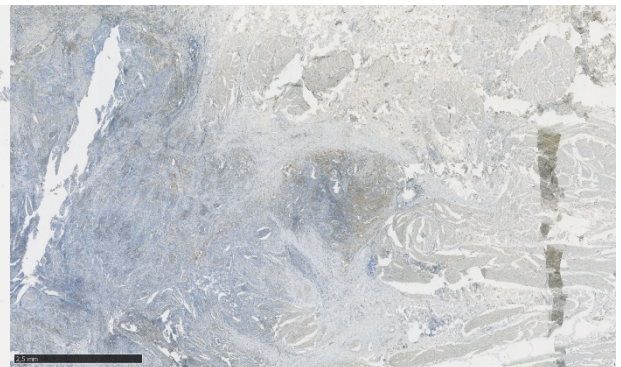

**patient 6**

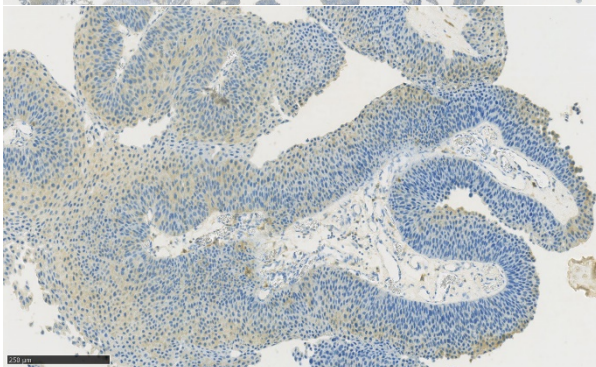

Negative to weak stained tumor. Few small moderate stained areas.

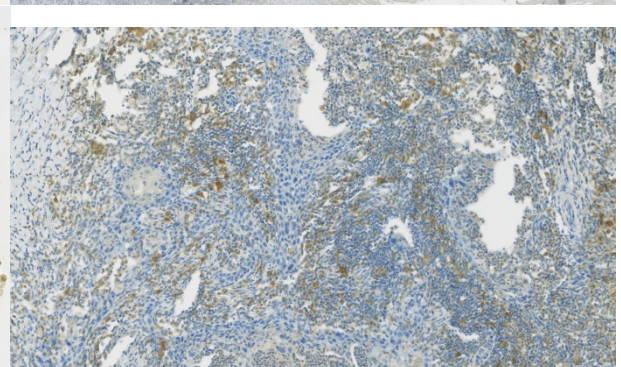

Negative as well as heterogeneous weak to moderate stained tumor cells. Few strong stained single tumor cells.

patient 7

NMIBC

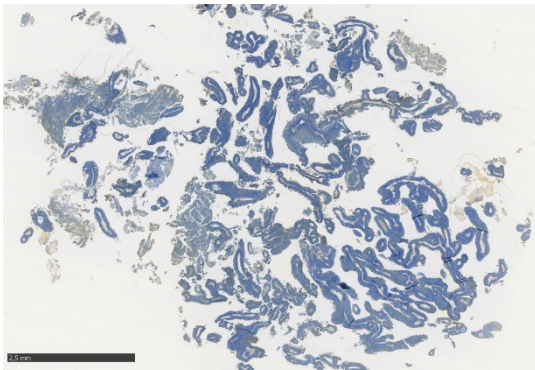

Mainly negative tumor areas. Focal weak stained peripheral tumor cells.

MIBC

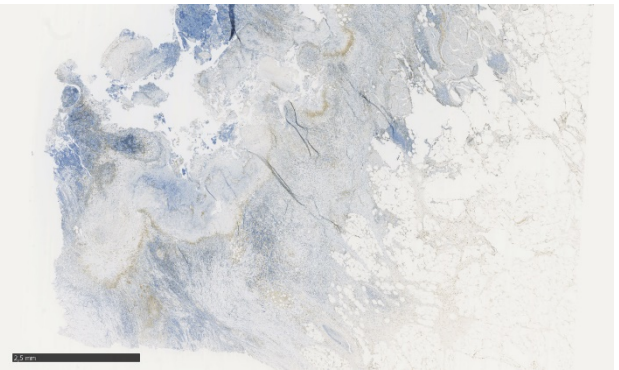

Mainly negative tumor areas. Few weak stained tumor cells.

patient 8

NMIBC

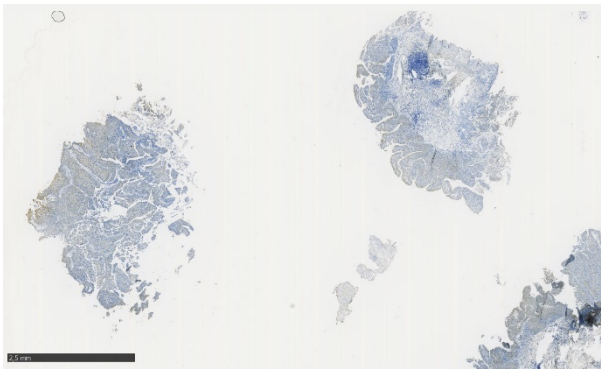

Negative to weak stained tumor cells. One small area with moderate stained peripheral cells.

MIBC

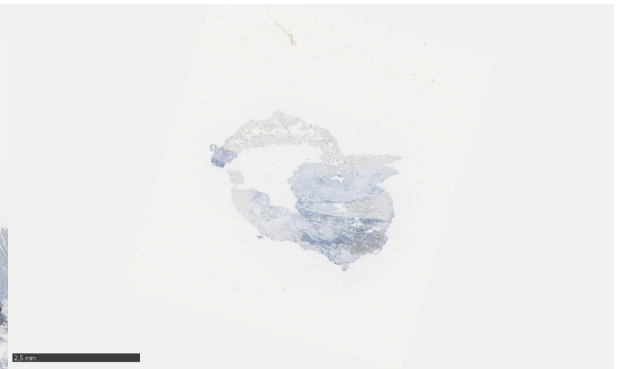

Mainly negative tumor cells. Weak staining in area with artefacts (bottom right). May be not representative small sample.

**Immunohistochemical staining of IQGAP2 in further MIBC (NMIBC not available)**

**MIBC**

**patient 3**

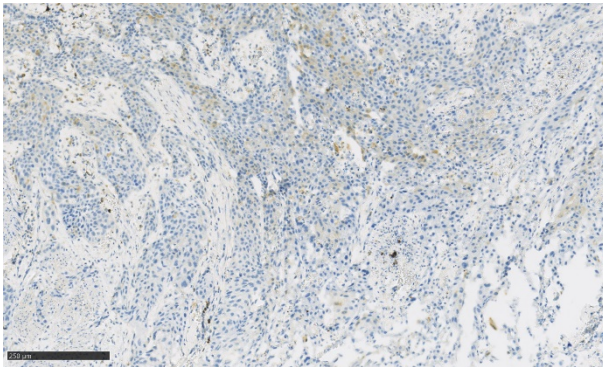

Negative tumor cells in muscle invasive layer. Increased weak staining of tumor cells towards non-muscle invasive areas and urothelium.

**MIBC**

**patient 9**

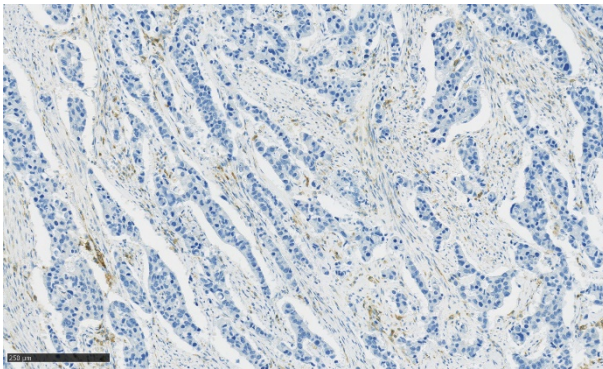

Completely negative tumor cells.

**MIBC**

**patient 10**

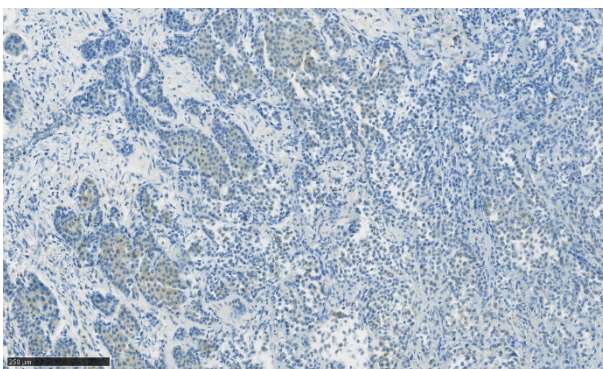

Mainly negative to weak and very small moderate stained tumor areas.

## MIBC

patient 11

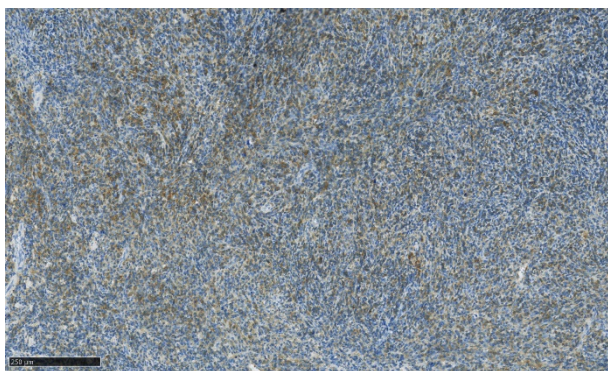

Tumor with strong infiltrated by immune cells. Partially weak to moderate stained tumor cells.

## Immunohistochemical staining of IQGAP2 in dysplastic urothelium from tumor samples

### dysplastic urothelium

patient 2

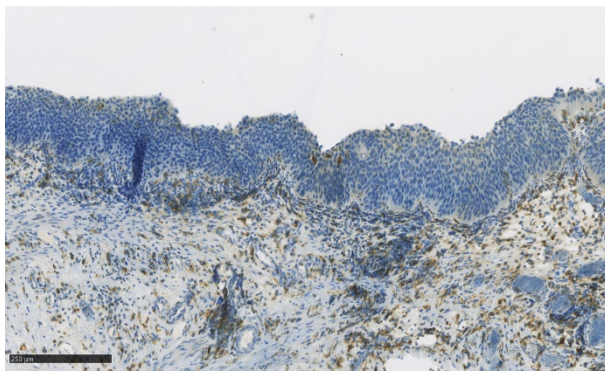

Mainly negative dysplastic urothelium with weak stained umbrella cells.

patient 3

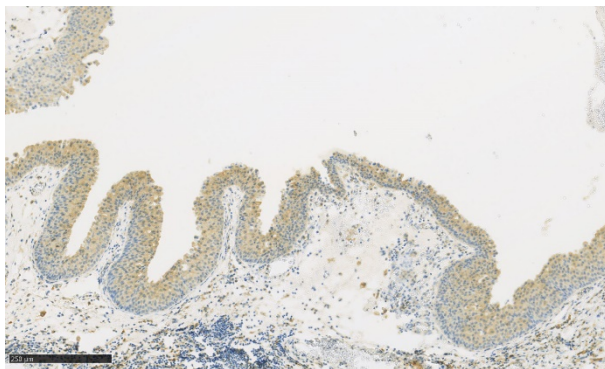

Weak to moderate stained dysplastic urothelium.

patient 6

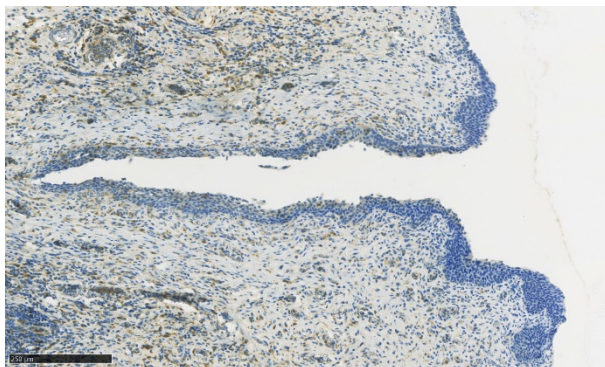

Negative dysplastic urothelium.

**Immunohistochemical staining of IQGAP2 in normal-like non-dysplastic urothelium from tumor samples**

**normal-like (non-dysplastic) urothelium**

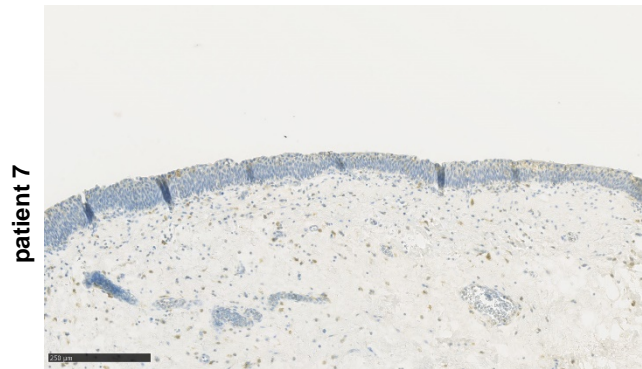

Mainly negative non-dysplastic urothelium with weak stained umbrella cells.

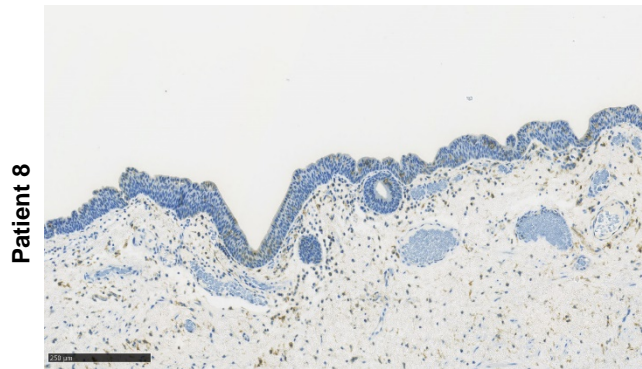

Mainly negative non-dysplastic urothelium with weak stained umbrella cells.

**Supplementary figure 1. Immunohistochemical staining of BCL9L in NMIBC, MIBC, dysplastic urothelium and normal-like urothelium of patients with progressive Bladder Cancer.** Overall average staining intensity of the tumor cells of the whole slide is specified as negative (-), weak (+), moderate (++) and strong (+++) referring to the proportion of tumor cells. Export from NDP.view as 1.25 or 10-fold magnification (2.5 mm/ 250  $\mu$ m scale bar). Anti-IQGAP2 1:50, Santa-Cruz sc-17835

Figure S2

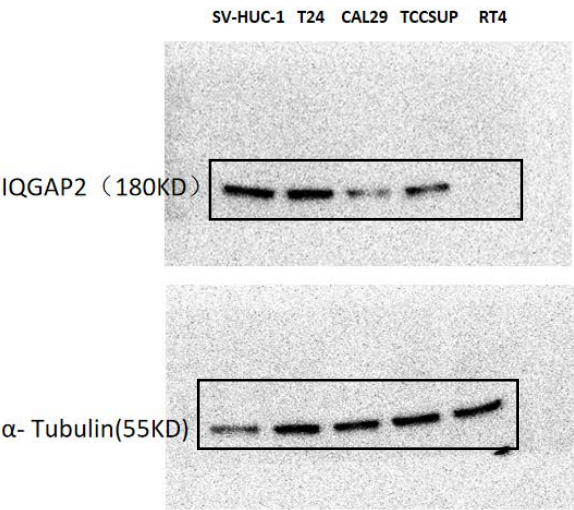

Supplementary figure 2.1. The IQGAP2 protein expression in 4 BC cell lines and 1 normal urothelial cell line

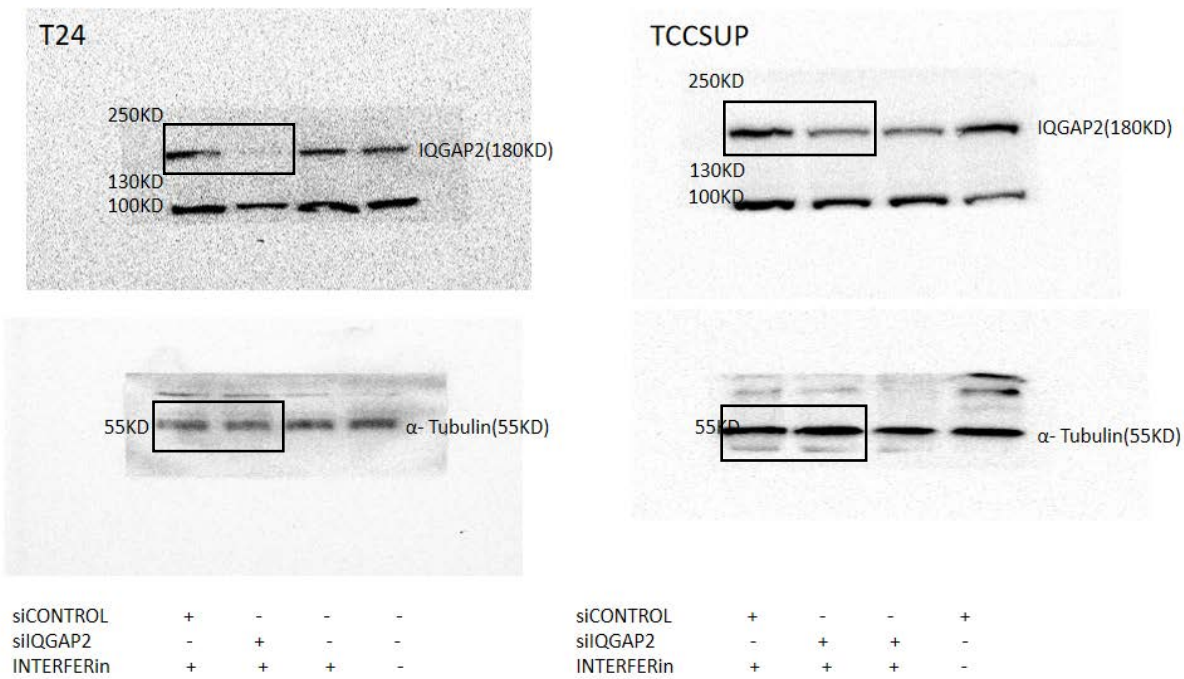

Supplementary figure 2.2. The knockdown confirmation of IQGAP2 in T24 and TCCsup cell line

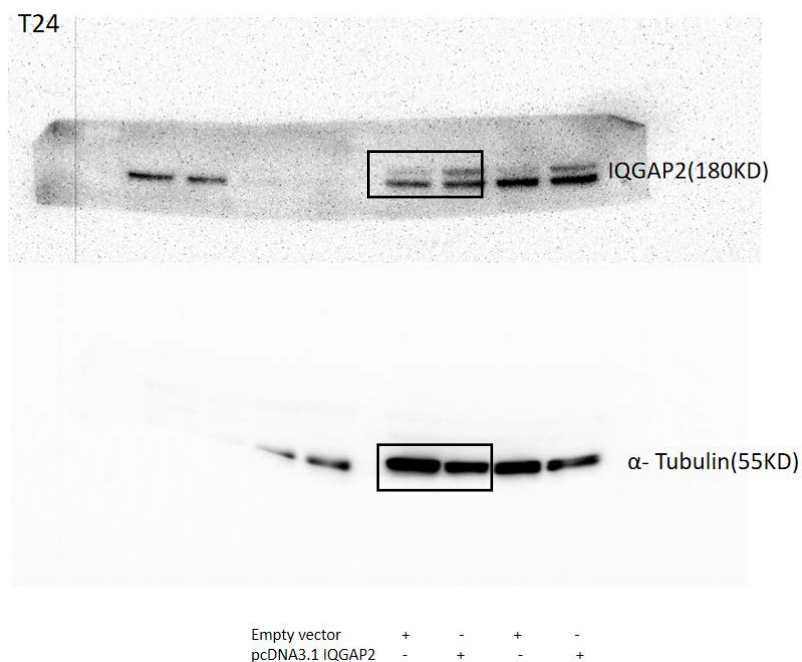

**Supplementary figure 2.3. The overexpression confirmation of IQGAP2 in T24 cell line**

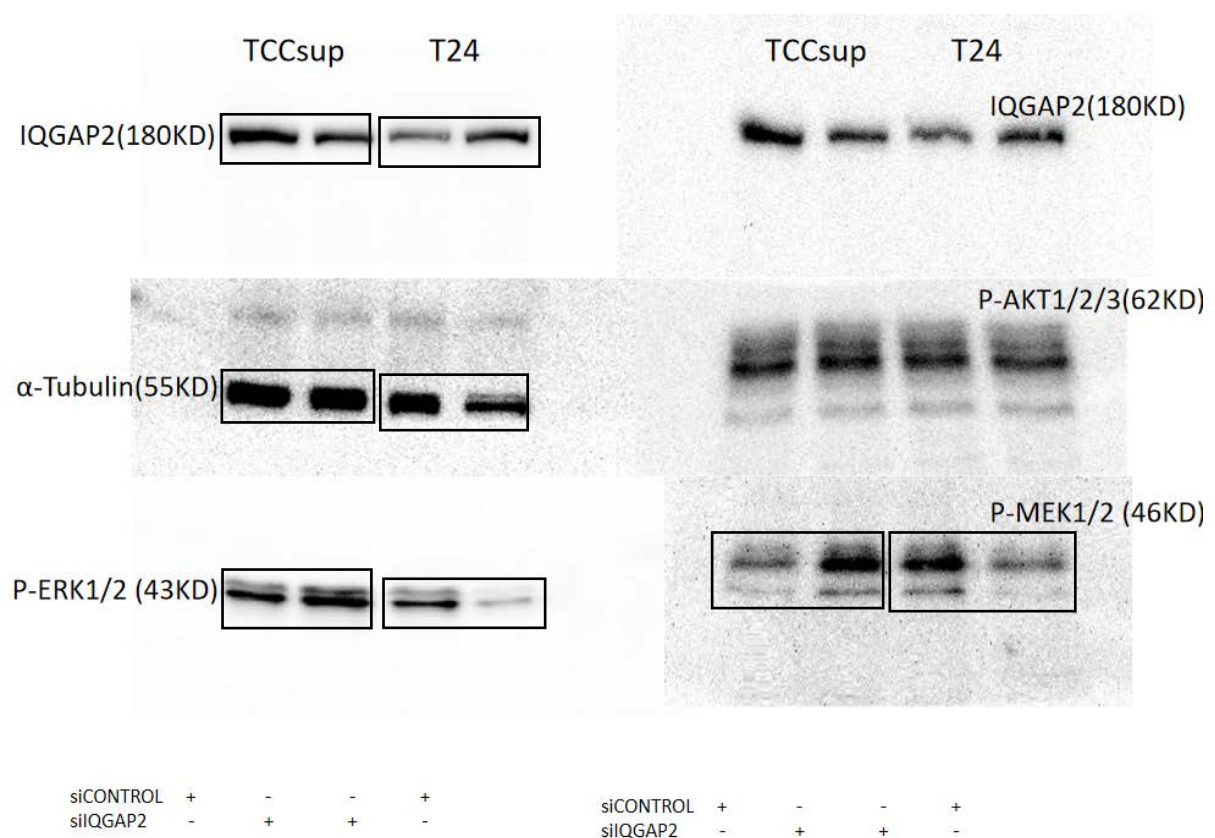

**Supplementary figure 2.4. Depletion of IQGAP2 increased phospho-MEK and phospho-ERK1/2 in T24 and TCCSUP. Depletion of IQGAP2 didn't effect the expression of phospho-AKT1/2/3**

T24

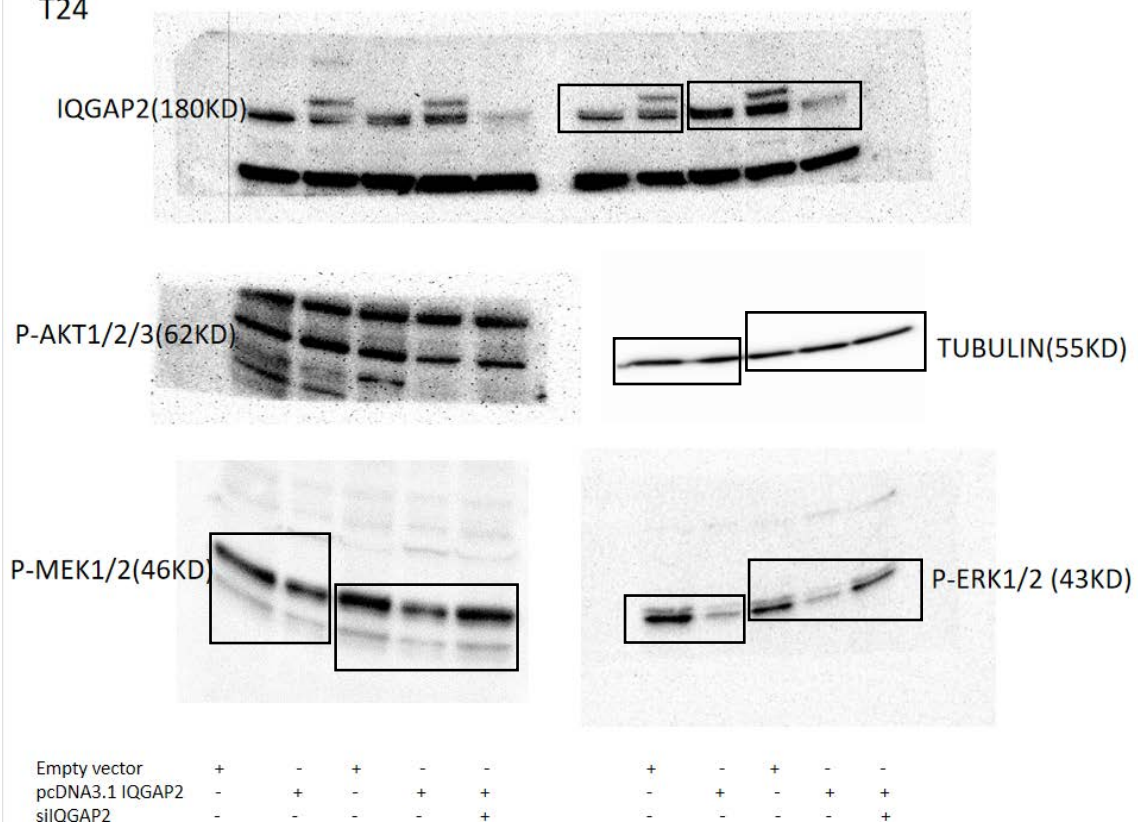

**Supplementary figure 2.5. Overexpression of IQGAP2 decreased phospho-MEK and phospho-ERK1/2 in T24. Overexpression of IQGAP2 didn't effect the expression of phospho-AKT1/2/3**

T24

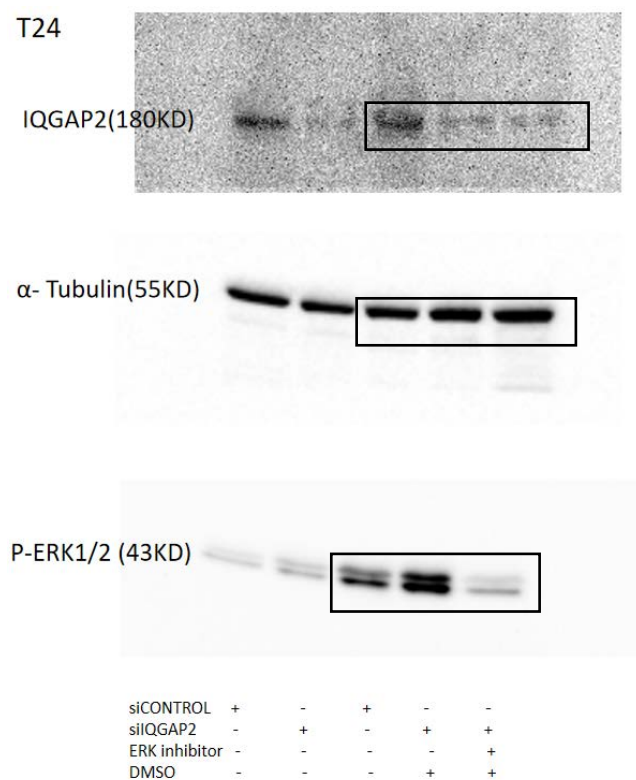

**Supplementary figure 2.6. The MEK inhibitor U1026 rescued the activated p-ERK induced by IQGAP2 depletion in T24 cell line**

**Figure S3**

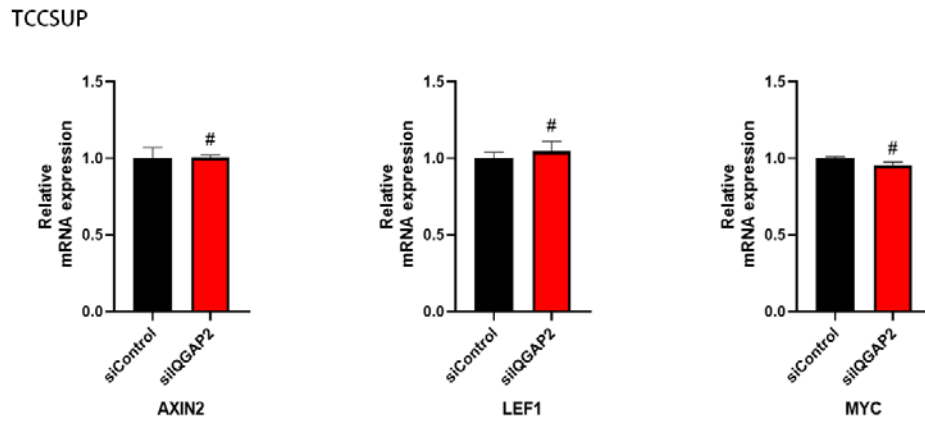

**Supplementary figure 3. The depletion of IQGAP2 in TCCSUP didn't effect the expression of wnt target genes**
